# **Virological characteristics of the novel SARS-CoV-2 Omicron variants including BA.2.12.1, BA.4 and BA.5**

Izumi Kimura<sup>1,28</sup>, Daichi Yamasoba<sup>1,2,28</sup>, Tomokazu Tamura<sup>3,28</sup>, Naganori Nao<sup>4,5,28</sup>, Yoshitaka Oda<sup>6,28</sup>, Shuya Mitoma<sup>7,28</sup>, Jumpei Ito<sup>1,28</sup>, Hesham Nasser<sup>8,9,28</sup>, Jiri Zahradnik<sup>10,28</sup>, Keiya Uriu<sup>1,11</sup>, Shigeru Fujita<sup>1,11</sup>, Yusuke Kosugi<sup>1,11</sup>, Lei Wang<sup>6,12</sup>, Masumi Tsuda<sup>6,12</sup>, Mai Kishimoto<sup>13</sup>, Hayato Ito<sup>3</sup>, Rigel Suzuki<sup>3</sup>, Ryo Shimizu<sup>8</sup>, MST Monira Begum<sup>8</sup>, Kumiko Yoshimatsu<sup>14</sup>, Jiei Sasaki<sup>15</sup>, Kaori Sasaki-Tabata<sup>16</sup>, Yuki Yamamoto<sup>17</sup>, Tetsuharu Nagamoto<sup>17</sup>, Jun Kanamune<sup>17</sup>, Kouji Kobiyama<sup>18,19</sup>, Hiroyuki Asakura<sup>20</sup>, Mami Nagashima<sup>20</sup>, Kenji Sadamasu<sup>20</sup>, Kazuhisa Yoshimura<sup>20</sup>, Jin Kuramochi<sup>21</sup>, Gideon Schreiber<sup>10</sup>, Ken J Ishii<sup>18,19</sup>, Takao Hashiguchi<sup>15</sup>, The Genotype to Phenotype Japan (G2P-Japan) Consortium, Terumasa Ikeda<sup>8\*</sup>, Akatsuki Saito<sup>7,22,23\*</sup>, Takasuke Fukuhara<sup>3\*</sup>, Shinya Tanaka<sup>6,12\*</sup>, Keita Matsuno<sup>5,24,25\*</sup>, Kei Sato<sup>1,11,19,26,27,29,30\*</sup>.

<sup>1</sup> Division of Systems Virology, Department of Microbiology and Immunology, The Institute of Medical Science, The University of Tokyo, Tokyo, Japan.

<sup>2</sup> Faculty of Medicine, Kobe University, Kobe, Japan.

<sup>3</sup> Department of Microbiology and Immunology, Graduate School of Medicine, Hokkaido University, Sapporo, Japan.

<sup>4</sup> Division of International Research Promotion, International Institute for Zoonosis Control, Hokkaido University, Sapporo, Japan.

<sup>5</sup> One Health Research Center, Hokkaido University, Sapporo, Japan.

<sup>6</sup> Department of Cancer Pathology, Faculty of Medicine, Hokkaido University, Sapporo, Japan.

<sup>7</sup> Department of Veterinary Science, Faculty of Agriculture, University of Miyazaki, Miyazaki, Japan.

<sup>8</sup> Division of Molecular Virology and Genetics, Joint Research Center for Human Retrovirus infection, Kumamoto University, Kumamoto, Japan.

<sup>9</sup> Department of Clinical Pathology, Faculty of Medicine, Suez Canal University, Ismailia, Egypt.

<sup>10</sup> Department of Biomolecular Sciences, Weizmann Institute of Science, Rehovot, Israel.

<sup>11</sup> Graduate School of Medicine, The University of Tokyo, Tokyo, Japan.

<sup>12</sup> Institute for Chemical Reaction Design and Discovery (WPI-ICReDD), Hokkaido University, Sapporo, Japan.

<sup>13</sup> Division of Molecular Pathobiology, International Institute for Zoonosis Control, Hokkaido University, Sapporo, Japan.

<sup>14</sup> Institute for Genetic Medicine, Hokkaido University, Sapporo, Japan.

<sup>15</sup> Laboratory of Medical Virology, Institute for Life and Medical Sciences, Kyoto University, Kyoto, Japan.

42 <sup>16</sup> Department of Medicinal Sciences, Graduate School of Pharmaceutical  
43 Sciences, Kyushu University, Fukuoka, Japan.

44 <sup>17</sup> HiLung Inc., Kyoto, Japan.

45 <sup>18</sup> Division of Vaccine Science, Department of Microbiology and Immunology,  
46 The Institute of Medical Science, The University of Tokyo, Tokyo, Japan.

47 <sup>19</sup> International Vaccine Design Center, The Institute of Medical Science, The  
48 University of Tokyo, Tokyo, Japan.

49 <sup>20</sup> Tokyo Metropolitan Institute of Public Health, Tokyo, Japan.

50 <sup>21</sup> Interpark Kuramochi Clinic, Utsunomiya, Japan.

51 <sup>22</sup> Center for Animal Disease Control, University of Miyazaki, Miyazaki, Japan.

52 <sup>23</sup> Graduate School of Medicine and Veterinary Medicine, University of Miyazaki,  
53 Miyazaki, Japan.

54 <sup>24</sup> International Collaboration Unit, International Institute for Zoonosis Control,  
55 Hokkaido University, Sapporo, Japan.

56 <sup>25</sup> Division of Risk Analysis and Management, International Institute for Zoonosis  
57 Control, Hokkaido University, Sapporo, Japan.

58 <sup>26</sup> International Research Center for Infectious Diseases, The Institute of Medical  
59 Science, The University of Tokyo, Tokyo, Japan.

60 <sup>27</sup> CREST, Japan Science and Technology Agency, Kawaguchi, Japan.

61 <sup>28</sup> These authors contributed equally

62 <sup>29</sup> Twitter: @SystemsVirology

63 <sup>30</sup> Lead Contact

64

65 \*Corresponding authors:

66 ikedat@kumamoto-u.ac.jp (Terumasa Ikeda);

67 sakatsuki@cc.miyazaki-u.ac.jp (Akatsuki Saito);

68 fukut@pop.med.hokudai.ac.jp (Takasuke Fukuhara);

69 tanaka@med.hokudai.ac.jp (Shinya Tanaka);

70 matsuk@czc.hokudai.ac.jp (Keita Matsuno);

71 KeiSato@g.ecc.u-tokyo.ac.jp (Kei Sato)

72

73 **Conflict of interest:** Yuki Yamamoto and Tetsuharu Nagamoto are founders  
74 and shareholders of HiLung, Inc. Jun Kanamune is an employee of HiLung, Inc.  
75 Yuki Yamamoto is a co-inventor of patents (PCT/JP2016/057254; "Method for  
76 inducing differentiation of alveolar epithelial cells", PCT/JP2016/059786,  
77 "Method of producing airway epithelial cells"). The other authors declare that no  
78 competing interests exist.

79

80 **Short title:** Characteristics of SARS-CoV-2 BA.4/5 variants (45/50 characters)

81 **Keywords:** SARS-CoV-2; COVID-19; Omicron; BA.4; BA.5; BA.2.12.1; BA.2;  
82 transmissibility; immune resistance; pathogenicity

## 83 **Abstract**

84 After the global spread of SARS-CoV-2 Omicron BA.2 lineage, some  
 85 BA.2-related variants that acquire mutations in the L452 residue of spike protein,  
 86 such as BA.2.9.1 and BA.2.13 (L452M), BA.2.12.1 (L452Q), and BA.2.11, BA.4  
 87 and BA.5 (L452R), emerged in multiple countries. Our statistical analysis  
 88 showed that the effective reproduction numbers of these L452R/M/Q-bearing  
 89 BA.2-related Omicron variants are greater than that of the original BA.2.  
 90 Neutralization experiments revealed that the immunity induced by BA.1 and  
 91 BA.2 infections is less effective against BA.4/5. Cell culture experiments showed  
 92 that BA.2.12.1 and BA.4/5 replicate more efficiently in human alveolar epithelial  
 93 cells than BA.2, and particularly, BA.4/5 is more fusogenic than BA.2.  
 94 Furthermore, infection experiments using hamsters indicated that BA.4/5 is more  
 95 pathogenic than BA.2. Altogether, our multiscale investigations suggest that the  
 96 risk of L452R/M/Q-bearing BA.2-related Omicron variants, particularly BA.4 and  
 97 BA.5, to global health is potentially greater than that of original BA.2.

98

## 99 **Highlights**

- 100 ● Spike L452R/Q/M mutations increase the effective reproduction number of
- 101 BA.2
- 102 ● BA.4/5 is resistant to the immunity induced by BA.1 and BA.2 infections
- 103 ● BA.2.12.1 and BA.4/5 more efficiently spread in human lung cells than BA.2
- 104 ● BA.4/5 is more pathogenic than BA.2 in hamsters

# 105 Introduction

106 Since the end of November 2021, the SARS-CoV-2 Omicron variant (B.1.1.529  
107 and BA lineages) has spread worldwide and has outcompeted prior  
108 SARS-CoV-2 variants of concern (VOCs) such as Delta. After the surge of  
109 Omicron BA.1 variant, another Omicron variant, BA.2, outcompeted BA.1 and  
110 has become the most dominant variant in the world (Ito et al., 2022; UKHSA,  
111 2022; Yamasoba et al., 2022a). Thereafter, as of May 2022, the Omicron  
112 subvariants that harbor the substitution at the L452 residue of spike (S) protein,  
113 such as BA.4 and BA.5, were frequently detected (Tegally et al., 2022; WHO,  
114 2022). These observations suggest that these novel Omicron subvariants  
115 bearing mutations at the S L452 residue are more transmissible than Omicron  
116 BA.2. These recent developments have led the WHO to these Omicron  
117 subvariants bearing mutations at the S L452 residue, BA.4, BA.5, BA.2.12.1,  
118 BA.2.9.1 and BA.2.11, as VOC lineages under monitoring (VOC-LUM) on May  
119 18, 2022 (WHO, 2022).

120 Resistance to antiviral humoral immunity can be mainly determined by  
121 the mutations in the S protein. For instance, Omicron BA.1 exhibits profound  
122 resistance to neutralizing antibodies induced by vaccination and natural  
123 SARS-CoV-2 infection as well as therapeutic monoclonal antibodies (Cao et al.,  
124 2021; Cele et al., 2021; Dejnirattisai et al., 2022; Garcia-Beltran et al., 2021; Liu  
125 et al., 2021; Meng et al., 2022; Planas et al., 2021; Takashita et al., 2022a;  
126 VanBlargan et al., 2022) and BA.2 (Bruehl et al., 2022; Takashita et al., 2022b;  
127 Yamasoba et al., 2022a; Yamasoba et al., 2022b). In addition to immune  
128 evasion, the mutations in the S protein potentially modulate viral pathogenicity.  
129 Particularly, the fusogenicity of S protein in in vitro cell cultures is closely  
130 associated with viral pathogenicity in an experimental hamster model. For  
131 example, the Delta S is highly fusogenic in cell cultures and highly pathogenic in  
132 hamsters when compared to ancestral D614G-bearing B.1.1 S (Saito et al.,  
133 2022). In contrast, the Omicron BA.1 S is less fusogenic and pathogenic than  
134 B.1.1 S (Meng et al., 2022; Suzuki et al., 2022). Furthermore, we have recently  
135 demonstrated that the Omicron BA.2 S is more fusogenic and potentially confers  
136 the virus higher pathogenicity than Omicron BA.1 S (Yamasoba et al., 2022a).

137 Newly emerging SARS-CoV-2 variants need to be carefully and rapidly  
138 assessed for a potential increase in growth efficacy in the human population,  
139 pathogenicity and/or evasion from antiviral immunity. The substitution at the  
140 L452 residue of SARS-CoV-2 S protein was detected in Delta (L452R) and  
141 Lambda (L452Q) variants, which were previously classified as a VOC and a  
142 variant of interest (VOI), respectively (WHO, 2022). Importantly, we previously  
143 demonstrated that the L452R (Motozono et al., 2021) and L452Q (Kimura et al.,  
144 2022a) mutations increase viral infectivity by promoting the binding of S receptor  
145 binding domain (RBD) to human ACE2. We have recently characterized the

146 virological features of SARS-CoV-2 Omicron BA.1 ([Meng \*et al.\*, 2022](#); [Suzuki \*et\*](#)  
147 [al., 2022](#)) and BA.2 ([Yamasoba \*et al.\*, 2022a](#)). However, the impact of the  
148 substitution of S L452 residue on the virological characteristics of Omicron BA.2  
149 remains unclear. Together with these findings, it is reasonable to assume that  
150 the novel BA.2-related Omicron variants bearing mutations at S L452 residue  
151 can be a potential risk for global health, and we herein elucidate the virological  
152 characteristics of these novel Omicron variants.

## 153 Results

154

### 155 Emergence of the BA.2-related Omicron bearing the L452R/Q/M mutations

156 Omicron substantially diversified during the epidemic. In South Africa, where  
 157 Omicron was first reported at the end of November 2022 (NICD, 2021a; b), a  
 158 variety of Omicron sublineages (BA.1–BA.5) continuously emerged (Figures 1A  
 159 and S1A) (Tegally *et al.*, 2022). Omicron BA.4 and BA.5 variants are closely  
 160 related to each other and bear identical S protein (Figure 1A). Because BA.4  
 161 and BA.5 form a monophyletic clade with BA.2 (Figure 1A), we herein refer to  
 162 BA.2, BA.4 and BA.5 as the BA.2-related Omicron variants. Compared to the  
 163 BA.2 S, the BA.4/5 S harbors the L452R, HV69-70del, and F486V mutations as  
 164 well as a revertant R493Q mutation. Notably, not only the BA.4 and BA.5  
 165 lineages, several BA.2 sublineages that bear the mutations at the S L452  
 166 residue also emerged (Figure 1B and Table S1). In-depth tracing of the  
 167 emergence of BA.2 variants bearing mutations at the S L452 residue detected  
 168 seven common ancestry groups of the BA.2 variants bearing L452R, L452Q or  
 169 L452M mutation in the S protein (Figures 1B, S1B, and S1C and Table S2). As  
 170 of May 15, 2022, the PANGO lineage (<https://cov-lineages.org>) annotates four  
 171 out of the seven BA.2 sublineages bearing mutations at the S L452 residue:  
 172 BA.2.9.1 (+S:L452M) in Denmark, BA.2.11 (+S:L452R) in France, BA.2.12.1  
 173 (+S:L452Q/S704L) in the USA, and BA.2.13 in Belgium (+S:L452M) (Figures  
 174 1B, 1C and S1B), while the other three lineages are not annotated yet (Figure  
 175 1B). On May 18, 2022, the WHO classified these six these L452R/M/Q-bearing  
 176 BA.2-related Omicron variants, which include BA.4, BA.5, BA.2.9.1, BA.2.11,  
 177 BA.2.12.1, BA.2.13 and as VOC-LUM (WHO, 2022). Most importantly, these  
 178 L452R/M/Q-bearing BA.2-related variants have higher effective reproduction  
 179 numbers ( $R_e$ ) than the original BA.2 (Figure 1D and Table S3). Particularly, the  
 180  $R_e$  values of BA.4, BA.5, and BA.2.12.1 are 1.19-, 1.21-, and 1.13-fold higher  
 181 than that of BA.2, respectively (Figure 1D), and these three variants begun  
 182 outcompeting original BA.2 in several countries (Figures 1E and S1D). As of  
 183 May 15, 2022, BA.4, BA.5, and BA.2.12.1 have been detected in 20, 19, and 36  
 184 countries, respectively (Table S4). Altogether, our data indicate that multiple  
 185 BA.2-related Omicron variants bearing the mutations at the S L452 residue  
 186 independently emerged in several countries, and further predict that these  
 187 Omicron variants, particularly BA.4, BA.5 and BA.2.12.1, will spread worldwide  
 188 and become the next predominant variants in the near future.

189

### 190 Immune resistance of the L452R/Q/M-bearing BA.2-related Omicron 191 variants

192 We have recently demonstrated that BA.4/5 is more resistant to a therapeutic  
 193 monoclonal antibody, cilgavimab, a component of Evusheld, than BA.2



(Yamasoba *et al.*, 2022b). Additionally, Khan *et al.* have recently demonstrated that BA.4 and BA.5 are relatively resistant to the antiviral humoral immunity induced by BA.1 infection (Khan *et al.*, 2022). To investigate the sensitivity of BA.2-related Omicron variants to antiviral humoral immunity, we prepared the pseudoviruses bearing the S proteins of these novel Omicron variants (BA.2.9.1, BA.2.11, BA.2.12.1 and BA.4/5) as well as their derivatives and original BA.2. Consistent with recent studies including ours (Khan *et al.*, 2022; Yamasoba *et al.*, 2022a), BA.2 was highly resistant to 14 convalescent sera from individuals who were infected with BA.1 (**Table S5**), and all BA.2-related Omicron variants tested were also resistant to these antisera (**Figure 2A**). In the case of the 16 sera infected with BA.1 from who were 2-dose or 3-dose vaccinated convalescents (i.e., BA.1 breakthrough infection) (**Table S5**), the sensitivity of BA.2.9.1 and BA.2.11 to these antisera was comparable to that of BA.2 (**Figure 2B**), and BA.2.12.1 was significantly (1.3-fold) more sensitive than BA.2 (**Figure 2B**;  $P = 0.021$  by the Wilcoxon signed-rank test). In contrast, BA.4/5 was significantly (2.3-fold) more resistant to BA.1 breakthrough infection sera than BA.2 (**Figure 2B**;  $P < 0.0001$  by the Wilcoxon signed-rank test), which is consistent with a recent study (Khan *et al.*, 2022). The assay using the BA.2 S derivatives bearing individual mutations of BA.4/5 and the BA.1 breakthrough infection sera showed that the F486V mutation confers resistance, while the insertion of HV69-70del and R493Q mutations made the pseudovirus more sensitive (**Figure 2B**). Interestingly, the HV69-70del mutation is present in BA.1 but not in BA.2, while the R493Q is a reversion mutation in BA.4/5 (i.e., BA.1 and BA.2 are R493, while ancestral B.1.1 and BA.4/5 are Q493) (Yamasoba *et al.*, 2022a). Therefore, these data suggest that the sensitivity of BA.2 HV69-70del mutant is attributed to BA.1 infection, while that of BA.2 R493Q is attributed to vaccination. Nevertheless, our data suggest that BA.4/5 is relatively more resistant to the immunity induced by BA.1 breakthrough infection than BA.2, and this resistance is attributed to the BA.4/5-specific F486V mutation.

We next tested the 16 sera infected with BA.2 from 8 convalescents who were not vaccinated and 1, 4 and 3 convalescents who were 1-dose, 2-dose, and 3-dose vaccinated convalescents, respectively (**Table S5**). As shown in **Figure 2C**, BA.2 convalescent sera did not exhibit antiviral effects against all variants tested including the D614G-bearing ancestral B.1.1. Although the BA.2 convalescent sera after breakthrough infection exhibited a stronger antiviral effect compared to the BA.2 convalescent sera without vaccination, BA.2 was 3.0-fold more resistant than B.1.1 (**Figure 2D**), suggesting that BA.2 infection does not induce efficient antiviral immunity. Nevertheless, BA.4/5 exhibited a significant (1.6-fold) resistance compared to BA.2 (**Figure 2D**;  $P = 0.047$  by the Wilcoxon signed-rank test). To further address the possibility of evasion of BA.2-related Omicron variants from the

immunity induced by the infection of original BA.2, we used the sera obtained from the hamsters infected with BA.2 (**Figure 2E**) (Yamasoba *et al.*, 2022a) and the mice immunized with recombinant protein of BA.2 S receptor binding domain (RBD) (**Figure 2F**). In both cases, BA.4/5 evaded the BA.2-induced immunity (**Figures 2E and 2F**). Altogether, these results suggest that BA.4/5 is resistant to the immunity induced by BA.1 and BA.2.

## Virological features of the L452R/Q/M-bearing BA.2-related Omicron S

To investigate the virological characteristics of the L452R/Q/M-bearing BA.2-related Omicron variants, we measured pseudovirus infectivity using HOS-ACE2/TMPRSS2 cells (Kimura *et al.*, 2022a; Motozono *et al.*, 2021; Saito *et al.*, 2022; Suzuki *et al.*, 2022; Uriu *et al.*, 2021; Yamasoba *et al.*, 2022a). As shown in **Figure 3A**, all BA.2-related Omicron variants tested exhibited significantly higher infectivity than BA.2. The pseudovirus infectivity of BA.2.9.1, BA.2.11, BA.2.12.1 was comparable to that of ancestral D614G-bearing B.1.1, and notably, the infectivity of BA.4/5 pseudovirus was 18.3-fold higher than that of BA.2 pseudovirus (**Figure 3A**). The BA.2 derivatives bearing L452Q, HV69-70del and F486V mutations exhibited increased infectivity (**Figure 3A**). These results suggest that multiple mutations in the BA.4/5 S including HV69-70del, L452R and F486V increase pseudovirus infectivity. However, when we use HEK293-ACE2/TMPRSS2 cells and HEK293-ACE2 cells, which do not express endogenous TMPRSS2 on the cell surface (Yamasoba *et al.*, 2022a), as target cells, the fold increase of pseudovirus infectivity of BA.2-related Omicron variants by the TMPRSS2 expression on the target cells was not observed (**Figure S2A**). These results suggest that the mutations detected in BA.2-related Omicron variants do not affect TMPRSS2 usage. Yeast surface display assay using SARS-CoV-2 S RBD and soluble human ACE2 (Dejnirattisai *et al.*, 2022; Kimura *et al.*, 2022a; Kimura *et al.*, 2022b; Motozono *et al.*, 2021; Yamasoba *et al.*, 2022a; Zahradnik *et al.*, 2021a) showed that the  $K_D$  value of BA.2 S RBD bearing L452R mutation is significantly lower than that of original BA.2 S RBD (**Figure 3B**), suggesting that the L452R mutation increases the binding affinity of BA.2 S RBD to human ACE2. On the other hand, the binding affinity of BA.4/5 S RBD to human ACE2 was comparable to that of BA.2 S RBD (**Figure 3B**).

We next analyzed the fusogenicity of BA.2-related Omicron variants by a cell-based fusion assay (Kimura *et al.*, 2022b; Motozono *et al.*, 2021; Saito *et al.*, 2022; Suzuki *et al.*, 2022; Yamasoba *et al.*, 2022a). As shown in **Figures 3C and S2B**, the L452R mutation (specific in the BA.2.11 variant) significantly increased the S expression on the cell surface, while the L452Q and L452M (specific in the BA.2.9.1 variant) mutations did not. On the other hand, surface expression of the S proteins of BA.2.12.1 and BA.4/5 was significantly lower



than that of original BA.2, and the decreased surface expression is attributed by the S704L mutation (specific in the BA.2.12.1 variant) and the HV69-70del, F486V and R493Q mutations (specific in the BA.4/5 variant) (**Figure 3C**). The cell-based fusion assay using Calu-3 cells as target cells showed that the fusogenicity of BA.2.11 S and BA.4/5 S was significantly greater than that of original BA.2 S, while the other mutations did not critically affect S-mediated fusogenicity (**Figure 3D**). When we use VeroE6/TMPRSS2 cells as target cells, all BA.2 derivatives bearing mutations at the L452 residue tested (i.e., L452R/M/Q mutations; BA.2.9.1, BA.2.11 and BA.2 L452Q) as well as the BA.4/5 significantly increased fusogenicity when compared to original BA.2, while the fusogenicity of the other mutants including BA.2.12.1 was comparable to original BA.2 (**Figure S2C**). Moreover, a coculture experiment using HEK293-ACE2/TMPRSS2 cells as the target cells (Suzuki *et al.*, 2022; Yamasoba *et al.*, 2022a) showed that the S proteins of BA.2.9.1, BA.2.11 and BA.4/5 but not BA.2.12.1 showed significantly increased fusogenicity than that of original BA.2 (**Figure S2D**). Altogether, these findings suggest that the L452R-bearing S proteins including BA.2.11 and BA.4/5 exhibited higher fusogenicity than BA.2 S in three independent experimental setups (**Figures 3D, S2C and S2D**).

### **Growth capacity of the L452R/Q/M-bearing BA.2-related Omicron in vitro**

We next prepared two sets of chimeric recombinant SARS-CoV-2 by reverse genetics (Kimura *et al.*, 2022b; Motozono *et al.*, 2021; Saito *et al.*, 2022; Torii *et al.*, 2021; Yamasoba *et al.*, 2022a): one is based on an ancestral lineage A genome (strain WK-521; PANGO lineage A, GISAID ID: EPI\_ISL\_408667) and encodes GFP in the ORF7a frame, which was used in our previous studies (Kimura *et al.*, 2022b; Saito *et al.*, 2022; Yamasoba *et al.*, 2022a) (**Figure 4A, left**), while the other is based on a clinical isolate of BA.2 (strain TY40-385; PANGO lineage BA.2, GISAID ID: EPI\_ISL\_9595859) (**Figure 4A, right**). The S genes of both recombinant viruses were swapped with those of BA.2-related Omicron variants: BA.2.11 (BA.2+L452R), BA.2.9.1 (BA.2+L452M), BA.2.12.1 (BA.2+L452Q/S704L) or BA.4/5 (BA.2+HV69-70del/L452R/F486V/R493Q) (**Figure 4A**). In the case of lineage A-based recombinant viruses (**Figure 4A, left**), the sizes of plaques formed by the infections of all BA.2-related Omicron variants (i.e., rBA.2.9.1 S-GFP, rBA.2.11 S-GFP, rBA.2.12.1 S-GFP and rBA.4/5 S-GFP) were significantly larger than that of rBA.2 S-GFP (**Figure 4B**). On the other hand, in the case of BA.2-based recombinant viruses (**Figure 4A, right**), the plaques formed by the infections of rBA.2.11 and rBA.4/5, which bear the L452R mutation, were larger than those formed by rBA.2 infection, and rBA.2.9.1 infection showed significantly smaller plaques than rBA.2 infection (**Figure 4C**). Corresponding to the results of the experiments using S expression

317 plasmids (**Figures 3D, S2C and S2D**), these data suggest that the BA.4/5 S is  
318 more fusogenic than the BA.2 S.

319 To measure the growth kinetics of BA.2-related Omicron variants, the  
320 lineage A-based (**Figure 4A, left**) and lineage BA.2-based (**Figure 4A, right**)  
321 viruses were inoculated into the cells. As shown in **Figures 4D-4G**, the  
322 replication kinetics of L452R/M/Q-bearing BA.2-related Omicron variants were  
323 comparable to that of BA.2 regardless of their backbones. Notably, although the  
324 growth kinetics of BA.2-related Omicron variants, which are based on the BA.2  
325 genome (**Figure 4A, right**), were relatively comparable in the culture of human  
326 airway epithelial cells derived from human induced pluripotent stem cells  
327 (iPSCs) (**Figure 4H**), rBA.2.9.1, rBA.2.12.1 and rBA.4/5 were significantly more  
328 efficiently replicated than rBA.2 in the human iPSC-derived alveolar epithelial  
329 cells (**Figure 4I**). Particularly, at 24 hours postinfection (h.p.i.), the levels of viral  
330 RNA in the supernatant of rBA.2.12.1- and rBA.4/5-infected cultures were  
331 61-fold and 34-fold higher than that of rBA.2-infected culture (**Figure 4I**). These  
332 results suggest that rBA.2.12.1 and rBA.4/5 more efficiently replicate in human  
333 alveolar epithelial cells than BA.2.

334

### 335 **Virological features of BA.2.12.1 and BA.4/5 in vivo**

336 To investigate the dynamics of viral replication of BA.2-related Omicron variants  
337 in vivo, we conducted hamster infection experiments using rBA.2, rBA.2.12.1  
338 and rBA.4/5 (**Figure 4A, right**). Consistent with a recent report ([Uraki et al., 2022](#)),  
339 the rBA.2-infected hamsters did not exhibit apparent disorders based on  
340 the body weight, two surrogate markers of bronchoconstriction or airway  
341 obstruction [enhanced pause (Penh) and the ratio of time to peak expiratory  
342 follow relative to the total expiratory time (Rpef)], as well as decreased  
343 subcutaneous oxygen saturation (SpO<sub>2</sub>) (**Figure 5A**). Notably, the body weights  
344 of rBA.2.12.1-infected and rBA.4/5-infected hamsters were significantly lower  
345 than that of rBA.2-infected hamsters (**Figure 5A**). Additionally, the Rpef value of  
346 rBA.4/5-infected hamsters was significantly lower than that of rBA.2-infected  
347 hamsters (**Figure 5A**). These data suggest that the L452R/Q-bearing  
348 BA.2-related Omicron variants, particularly BA.4/5, exhibit higher pathogenicity  
349 than BA.2.

350 To analyze viral spread in the respiratory organs of infected hamsters,  
351 the viral RNA load and nucleocapsid (N) expression were assessed by  
352 RT-qPCR analysis of viral RNA and immunohistochemistry (IHC), respectively.  
353 As shown in **Figure 5B**, the viral RNA loads in the lung hilum of rBA.2.12.1- and  
354 rBA.4/5-infected hamsters were significantly higher than that of rBA.2-infected  
355 hamsters. Intriguingly, the viral RNA loads in the oral swab (**Figure 5B, top**) and  
356 lung periphery (**Figure 5B, bottom**) of rBA.4/5-infected hamsters were  
357 significantly higher than that of rBA.2, while those of rBA.2.12.1 were not

significantly different from those of rBA.2. In particular, the levels of viral RNA in the lung periphery of rBA.4/5-infected hamsters at 3 and 5 days postinfection (d.p.i.) were 5.7-fold and 4.2-fold higher than those of rBA.2-infected hamsters, respectively (**Figure 5B, bottom**). The higher level of viral load in the lung periphery of rBA.4/5-infected hamsters than rBA.2-infected hamsters was also supported by the level of infectious viruses in these regions (**Figure 5C**). These results suggest that rBA.4/5 more efficiently spread in the lung of infected hamsters than rBA.2.

To address the possibility that rBA.4/5 spreads more efficiently than the BA.2, we investigated N protein positivity in the trachea and the lung area close to the hilum. At 1 d.p.i., there was no apparent difference in the N protein positivity in the tracheal epithelium among rBA.2-, rBA.2.12.1, and rBA.4/5-infected hamsters (**Figure S3A**). In the bronchial and bronchiolar epithelia, rBA.2.12.1 and BA.4/5 infections exhibited N-positive cells when compared to rBA.2 (**Figure 5D**). At 3 d.p.i., alveolar positivity was observed in rBA.2.12.1- and rBA.4/5-infected lungs but not in rBA.2-infected lungs (**Figure 5D**). Morphometry showed that the percentage of N-positive cells in rBA.2.12.1- and rBA.4/5-infected lungs was significantly higher than that in rBA.2-infected lungs at 3 d.p.i. (**Figures 5E and S3B**). At 5 d.p.i., N protein expression had almost disappeared in all infected lungs (**Figure 5D**). These data suggest that the rBA.2.12.1 and rBA.4/5 more efficiently spread in the lung tissues compared to rBA.2.

### **Pathogenicity of BA.2.12.1 and BA.4/5 in vivo**

To investigate the pathogenicity of BA.2.12.1 and BA.4/5, the right lungs of infected hamsters were collected at 1, 3, and 5 d.p.i. and subjected to histopathological analysis (**Figure 5F**) and hematoxylin and eosin (H&E) staining (**Figure 5G**) ([Saito et al., 2022](#); [Suzuki et al., 2022](#); [Yamasoba et al., 2022a](#)). Three histological parameters, including bronchitis/bronchiolitis, hemorrhage/congestion and alveolar damage, as well as the total score of histology of rBA.2.12-infected hamsters were significantly higher than those of rBA.2-infected hamsters (**Figures 5F and 5G**). More importantly, all histopathological parameters were highest in rBA.4/5-infected hamsters with statistical significances (**Figure 5F**). Furthermore, in the lungs of infected hamsters at 5 d.p.i., the level of inflammation with type II alveolar pneumocyte hyperplasia by rBA.4/5 infection was significantly higher than that by rBA.2 infection, while there was no statistically significant difference between rBA.2.12.1 and rBA.2 infections (**Figure 5H and S3C**). The relatively more severe disorders in the lungs of rBA.4/5-infected hamsters than those of rBA.2-infected hamsters (**Figures 5F-5H**) were supported by the more efficient spread of rBA.4/5 than rBA.2 in the infected lungs (**Figures 5B, bottom and 5C**).

399 Altogether, these observations suggest that rBA.4/5 is highly pathogenic than  
400 rBA.2 in a hamster model.

## 401 Discussion

402 Viral transmissibility, immune resistance and pathogenicity characterize the  
403 potential risk of new SARS-CoV-2 variant to global health. In this study, we  
404 investigated the virological characteristics of five “novel Omicron variants”,  
405 BA.2.9.1, BA.2.11, BA.2.12.1, BA.4 and BA.5. In these five variants, BA.4/5  
406 renders highest potential risk in terms of the growth efficacy in the human  
407 population, resistance to antiviral humoral immunity, and pathogenicity in an  
408 experimental animal model.

409 As a common characteristic of the five BA.2-related Omicron variants  
410 focused in this study, the S proteins of these variants bear a mutation at the  
411 residue 452: BA.2.11 and BA.4/5, BA.2.9.1, and BA.2.12.1 respectively possess  
412 R, M and Q instead of parental L residue. The L452R and L452Q substitutions  
413 were present in previous a VOC and a VOI such as the Delta and Lambda  
414 variants (WHO, 2022), and in our previous studies (Kimura *et al.*, 2022a;  
415 Motozono *et al.*, 2021), we demonstrated that the L452R/Q mutation increases  
416 the binding affinity of S RBD to human ACE2, and thereby, increases  
417 pseudovirus infectivity. Here we demonstrated that the L452R mutation  
418 increases binding affinity to human ACE2 and pseudovirus infectivity even in the  
419 BA.2 S backbone. Therefore, together with our previous reports (Kimura *et al.*,  
420 2022a; Motozono *et al.*, 2021), Additionally, the S proteins of BA.4 and BA.5  
421 harbor the HV69-70del mutation, which was detected in the Alpha variant, a prior  
422 VOC. Consistent with a previous study (Meng *et al.*, 2021), we demonstrated  
423 that the insertion of HV69-70del mutation increases pseudovirus infectivity.  
424 Altogether, multiple mutations in the S protein of BA.4/5 contribute to enhanced  
425 growth capacity in human lung cell culture and the lung of an experimental  
426 animal model.

427 In our previous studies that focused on Delta (Saito *et al.*, 2022),  
428 Omicron BA.1 (Suzuki *et al.*, 2022) and Omicron BA.2 (Yamasoba *et al.*, 2022a),  
429 we suggested close association between viral fusogenicity in in vitro cell cultures  
430 and pathogenicity in vivo. For instance, a less fusogenic virus such as Omicron  
431 BA.1 was less pathogenic, while a more fusogenic virus such as Delta was more  
432 pathogenic (Saito *et al.*, 2022; Suzuki *et al.*, 2022). Here we demonstrated that  
433 the Omicron BA.4/5 variant is more fusogenic and pathogenic than the Omicron  
434 BA.2 variant. Consistent with previous findings (Saito *et al.*, 2022; Suzuki *et al.*,  
435 2022; Yamasoba *et al.*, 2022a), our data support the possibility that higher  
436 fusogenic virus tends to exhibit potentially higher pathogenicity at least in  
437 experimental animal models. Therefore, measuring the fusogenicity of viral S  
438 protein can be a rapid surrogate marker to assume potential viral pathogenicity.

439 A simplistic assumption without conclusive evidence implies that  
440 SARS-CoV-2 will evolve to attenuate its pathogenicity. However, we argue  
441 against this notion with at least three observations. First, the Delta variant

exhibited relatively higher pathogenicity than the ancestral B.1 virus in an experimental animal model (Saito *et al.*, 2022). Clinical studies also provide evidence suggesting the higher virulence of the Delta variant than other prior variants including the Alpha variant (Ong *et al.*, 2021; Sheikh *et al.*, 2021; Twohig *et al.*, 2022). Second, although the Omicron BA.1 variant was less pathogenic than Delta and ancestral B.1.1 virus (Suzuki *et al.*, 2022), the S protein of a subsequently spread variant, Omicron BA.2, acquired the potential to exhibit higher pathogenicity than that of Omicron BA.1 (Yamasoba *et al.*, 2022a). Third, here we demonstrated that the Omicron BA.4/5 are more potentially pathogenic than Omicron BA.2. Therefore, our observations strongly suggest that SARS-CoV-2 does not necessarily evolve to attenuate its pathogenicity.

454

### Limitations of the study

In our previous study, we used a chimeric virus bearing the BA.2 S gene in a non-BA.2 (PANGO lineage A) genomic backbone and showed the BA.2 S-bearing chimeric virus is more pathogenic in infected hamsters than the BA.1 S-bearing chimeric virus (Yamasoba *et al.*, 2022a). However, another study using a clinical isolate of BA.2 showed a comparable pathogenicity to a BA.1 clinical isolate (Uraki *et al.*, 2022). This inconsistency of BA.2 pathogenicity found between our recent study (Yamasoba *et al.*, 2022a) and other's (Uraki *et al.*, 2022) would be due to the difference of the viral sequence in the non-S region. In fact, there are 26 mutations in the non-S region between BA.2 and the non-BA.2 backbone (PANGO lineage A) used in our previous study (Yamasoba *et al.*, 2022a) (Table S1). To avoid such inconsistency, here we used the recombinant viruses based on BA.2 for hamster experiments: compared to BA.2, the majority of BA.2.12.1 does not possess any mutations in the non-S region (Table S1), indicating that the BA.2-based recombinant virus encoding BA.2.12.1 S used for hamster experiments (rBA.2.12.1) is an authentic BA.2.12.1. Moreover, only six or two mutations were detected in the non-S regions of BA.4 and BA.5 genomes, respectively (Table S1). Therefore, it would be reasonable to assume that our findings in the use of recombinant viruses reflect the pathogenic potential of authentic BA.4/5 in a hamster model.



## 475 **STAR<sup>®</sup>METHODS**

### 476 • KEY RESOURCES TABLE

### 477 • RESOURCE AVAILABILITY

478 ○ Lead Contact

479 ○ Materials Availability

480 ○ Data and Code Availability

### 481 • EXPERIMENTAL MODEL AND SUBJECT DETAILS

482 ○ Ethics Statement

483 ○ Human serum collection

484 ○ Cell culture

### 485 • METHOD DETAILS

486 ○ Viral genome sequencing

487 ○ Phylogenetic and comparative genome analyses

488 ○ Definition of common ancestry groups of the BA.2 variants bearing  
489 mutations at position 452 in S

490 ○ Modeling the epidemic dynamics of SARS-CoV-2 lineages

491 ○ Plasmid construction

492 ○ Preparation of BA.2 S RBD

493 ○ Preparation of mouse sera

494 ○ Preparation of human airway and alveolar epithelial cells from human  
495 iPSCs

496 ○ Neutralization assay

497 ○ Pseudovirus infection

498 ○ Yeast surface display

499 ○ SARS-CoV-2 S-based fusion assay

500 ○ Coculture experiment

501 ○ SARS-CoV-2 reverse genetics

502 ○ SARS-CoV-2 preparation and titration

503 ○ Plaque assay

504 ○ SARS-CoV-2 infection

505 ○ RT-qPCR

506 ○ Animal experiments

507 ○ Lung function test

508 ○ IHC

509 ○ H&E staining

510 ○ Histopathological scoring

### 511 • QUANTIFICATION AND STATISTICAL ANALYSIS

512

## 513 **Supplemental Information**

514 Additional Supplemental Items are available upon request.

## 515 **Author Contributions**

516 Izumi Kimura, Daichi Yamasoba, Tomokazu Tamura, Shuya Mitoma, Hesham  
 517 Nasser, Keiya Uriu, Shigeru Fujita, Yusuke Kosugi, Hayato Ito, Rigel Suzuki,  
 518 Ryo Shimizu, MST Monira Begum, Terumasa Ikeda, Akatsuki Saito and  
 519 Takasuke Fukuhara performed cell culture experiments.  
 520 Jiri Zahradnik and Gideon Schreiber performed a yeast surface display assay.  
 521 Jiei Sasaki, Kaori Sasaki-Tabata and Takao Hashiguchi prepared SARS-CoV-2  
 522 S RBD.  
 523 Kouji Kobiyama and Ken J Ishii prepared SARS-CoV-2 S RBD-immunized  
 524 murine sera.  
 525 Daichi Yamasoba, Tomokazu Tamura, Naganori Nao, Mai Kishimoto, Rigel  
 526 Suzuki, Kumiko Yoshimatsu and Keita Matsuno performed animal experiments.  
 527 Yoshitaka Oda, Lei Wang, Masumi Tsuda and Shinya Tanaka performed  
 528 histopathological analysis.  
 529 Hiroyuki Asakura, Mami Nagashima, Kenji Sadamasu, Kazuhisa Yoshimura  
 530 performed viral genome sequencing analysis.  
 531 Yuki Yamamoto, Tetsuharu Nagamoto, and Jun Kanamune performed  
 532 generation and provision of human iPSC-derived airway and alveolar epithelial  
 533 cells.  
 534 Jin Kuramochi contributed clinical sample collection.  
 535 Jumpei Ito performed statistical, modelling, and bioinformatics analyses.  
 536 Jumpei Ito, Terumasa Ikeda, Akatsuki Saito, Takasuke Fukuhara, Shinya  
 537 Tanaka, Keita Matsuno and Kei Sato designed the experiments and interpreted  
 538 the results.  
 539 Jumpei Ito and Kei Sato wrote the original manuscript.  
 540 All authors reviewed and proofread the manuscript.  
 541 The Genotype to Phenotype Japan (G2P-Japan) Consortium contributed to the  
 542 project administration.

## 544 **Conflict of interest**

545 The authors declare that no competing interests exist.

## 547 **Acknowledgments**

548 We would like to thank all members belonging to The Genotype to Phenotype  
 549 Japan (G2P-Japan) Consortium. We thank Dr. Kenzo Tokunaga (National  
 550 Institute for Infectious Diseases, Japan) and Dr. Jin Gohda (The University of  
 551 Tokyo, Japan) and Dr. Hisashi Arase (Osaka University) for providing reagents.  
 552 We also thank National Institute for Infectious Diseases, Japan, for providing a  
 553 clinical isolate of Omicron BA.2 (GISAID ID: EPI\_ISL\_9595859). We gratefully  
 554 acknowledge the laboratories responsible for obtaining the specimens and the  
 555 laboratories where genetic sequence data were generated and shared via the

556 GISAID Initiative. A full list of originating and submitting laboratories for the  
557 sequences used in our analysis can be found at <https://www.gisaid.org> using the  
558 EPI-SET-ID: EPI\_SET\_20220526dn. The super-computing resource was  
559 provided by Human Genome Center at The University of Tokyo.

560 This study was supported in part by AMED Research Program on  
561 Emerging and Re-emerging Infectious Diseases (JP21fk0108465, to Akatsuki  
562 Saito; JP20fk0108401, to Takasuke Fukuhara; JP20fk010847, to Takasuke  
563 Fukuhara; JP21fk0108617 to Takasuke Fukuhara; JP21fk0108146, to Kei Sato;  
564 JP22fk0108146, to Kei Sato; JP20fk0108413, to Terumasa Ikeda and Kei Sato;  
565 and JP20fk0108451, to G2P-Japan Consortium, Akatsuki Saito, Keita Matsuno,  
566 Takasuke Fukuhara, Terumasa Ikeda, and Kei Sato; JP20fk0108407, to Yuki  
567 Yamamoto and Tetsuharu Nagamoto); AMED Research Program on HIV/AIDS  
568 (JP21fk0410033, to Akatsuki Saito; JP22fk0410033, to Akatsuki Saito;  
569 JP22fk0410047, to Akatsuki Saito; JP22fk0410055, to Terumasa Ikeda;  
570 JP21fk0410039, to Kei Sato; and JP22fk0410039, to Kei Sato); AMED CRDF  
571 Global Grant (JP21jk0210039 to Akatsuki Saito; and JP22jk0210039 to Akatsuki  
572 Saito); AMED Japan Program for Infectious Diseases Research and  
573 Infrastructure (JP21wm0325009, to Akatsuki Saito; JP22wm0325009, to  
574 Akatsuki Saito; JP22wm0125008 to Keita Matsuno); JST A-STEP  
575 (JPMJTM20SL, to Terumasa Ikeda); JST SICORP (e-ASIA) (JPMJSC20U1, to  
576 Kei Sato); JST SICORP (JPMJSC21U5, to Kei Sato), JST CREST  
577 (JPMJCR20H4, to Kei Sato; JPMJCR20H8, to Takao Hashiguchi); JSPS  
578 KAKENHI Grant-in-Aid for Scientific Research C (19K06382, to Akatsuki Saito;  
579 22K07103, to Terumasa Ikeda); JSPS KAKENHI Grant-in-Aid for Scientific  
580 Research B (21H02736, to Takasuke Fukuhara; 18H02662, to Kei Sato; and  
581 21H02737, to Kei Sato); JSPS KAKENHI Grant-in-Aid for Early-Career  
582 Scientists (22K16375, to Hesham Nasser; 20K15767, Jumpei Ito); JSPS Fund  
583 for the Promotion of Joint International Research (Fostering Joint International  
584 Research) (18KK0447, to Kei Sato); JSPS Core-to-Core Program (A. Advanced  
585 Research Networks) (JPJSCCA20190008, to Kei Sato); JSPS Research Fellow  
586 DC1 (19J20488, to Izumi Kimura); JSPS Research Fellow DC2 (22J11578, to  
587 Keiya Uriu); JSPS Leading Initiative for Excellent Young Researchers (LEADER)  
588 (to Terumasa Ikeda); World-leading Innovative and Smart Education (WISE)  
589 Program 1801 from the Ministry of Education, Culture, Sports, Science and  
590 Technology (MEXT) (to Naganori Nao); Ministry of Education, Culture, Sports,  
591 Science and Technology grant 20H05773 (to Takao Hashiguchi); The Tokyo  
592 Biochemical Research Foundation (to Kei Sato); Mitsubishi Foundation (to  
593 Terumasa Ikeda); Shin-Nihon Foundation of Advanced Medical Research (to  
594 Terumasa Ikeda); Waksman Foundation of Japan (to Terumasa Ikeda); a Grant  
595 for Joint Research Projects of the Research Institute for Microbial Diseases,  
596 Osaka University (to Akatsuki Saito); an intramural grant from Kumamoto

597 University COVID-19 Research Projects (AMABIE) (to Terumasa Ikeda);  
 598 Intercontinental Research and Educational Platform Aiming for Eradication of  
 599 HIV/AIDS (to Terumasa Ikeda).

600

601 **Consortia**

602 The Genotype to Phenotype Japan (G2P-Japan) Consortium: Mai Suganami,  
 603 Mika Chiba, Naoko Misawa, Ryo Yoshimura, Hirofumi Sawa, Kana Tsushima,  
 604 Haruko Kubo, Zannatul Ferdous, Hiromi Mouri, Miki Iida, Keiko Kasahara,  
 605 Koshiro Tabata, Mariko Ishizuka, Asako Shigeno, Isao Yoshida, So Nakagawa,  
 606 Jiaqi Wu, Miyoko Takahashi, Kotaro Shirakawa, Akifumi Takaori-Kondo,  
 607 Yasuhiro Kazuma, Ryosuke Nomura, Yoshihito Horisawa, Yusuke Tashiro,  
 608 Yohei Yanagida, Yugo Kawai, Takashi Irie, Ryoko Kawabata, Otowa Takahashi,  
 609 Kimiko Ichihara, Kazuko Kitazato, Haruyo Hasebe, Chihiro Motozono,  
 610 Takamasa Ueno, Toong Seng Tan, Isaac Ngare, Erika P. Butlertanaka, Yuri L.  
 611 Tanaka

# References

- Aricescu, A.R., Assenberg, R., Bill, R.M., Busso, D., Chang, V.T., Davis, S.J., Dubrovsky, A., Gustafsson, L., Hedfalk, K., Heinemann, U., et al. (2006). Eukaryotic expression: developments for structural proteomics. *Acta Crystallogr D Biol Crystallogr* 62, 1114-1124. 10.1107/S0907444906029805.
- Bruel, T., Hadjadj, J., Maes, P., Planas, D., Seve, A., Staropoli, I., Guivel-Benhassine, F., Porrot, F., Bolland, W.H., Nguyen, Y., et al. (2022). Serum neutralization of SARS-CoV-2 Omicron sublineages BA.1 and BA.2 in patients receiving monoclonal antibodies. *Nat Med*. 10.1038/s41591-022-01792-5.
- Cao, Y., Wang, J., Jian, F., Xiao, T., Song, W., Yisimayi, A., Huang, W., Li, Q., Wang, P., An, R., et al. (2021). Omicron escapes the majority of existing SARS-CoV-2 neutralizing antibodies. *Nature*, doi: <https://doi.org/10.1038/d41586-41021-03796-41586>.
- Capella-Gutierrez, S., Silla-Martinez, J.M., and Gabaldon, T. (2009). trimAl: a tool for automated alignment trimming in large-scale phylogenetic analyses. *Bioinformatics* 25, 1972-1973. 10.1093/bioinformatics/btp348.
- Cele, S., Jackson, L., Khoury, D.S., Khan, K., Moyo-Gwete, T., Tegally, H., San, J.E., Cromer, D., Scheepers, C., Amoako, D., et al. (2021). Omicron extensively but incompletely escapes Pfizer BNT162b2 neutralization. *Nature*, doi: <https://doi.org/10.1038/d41586-41021-03824-41585>.
- Chen, S., Zhou, Y., Chen, Y., and Gu, J. (2018). fastp: an ultra-fast all-in-one FASTQ preprocessor. *Bioinformatics* 34, i884-i890. 10.1093/bioinformatics/bty560.
- Cingolani, P., Platts, A., Wang le, L., Coon, M., Nguyen, T., Wang, L., Land, S.J., Lu, X., and Ruden, D.M. (2012). A program for annotating and predicting the effects of single nucleotide polymorphisms, SnpEff: SNPs in the genome of *Drosophila melanogaster* strain w1118; iso-2; iso-3. *Fly (Austin)* 6, 80-92. 10.4161/fly.19695.
- Dejnirattisai, W., Huo, J., Zhou, D., Zahradnik, J., Supasa, P., Liu, C., Duyvesteyn, H.M.E., Ginn, H.M., Mentzer, A.J., Tuekprakhon, A., et al. (2022). SARS-CoV-2 Omicron-B.1.1.529 leads to widespread escape from neutralizing antibody responses. *Cell* 185, 467-484 e415. 10.1016/j.cell.2021.12.046.
- Ferreira, I., Kemp, S.A., Datir, R., Saito, A., Meng, B., Rakshit, P., Takaori-Kondo, A., Kosugi, Y., Uriu, K., Kimura, I., et al. (2021). SARS-CoV-2 B.1.617 mutations L452R and E484Q are not synergistic for antibody evasion. *J Infect Dis* 224, 989-994. 10.1093/infdis/jiab368.
- Garcia-Beltran, W.F., Lam, E.C., St Denis, K., Nitido, A.D., Garcia, Z.H., Hauser, B.M., Feldman, J., Pavlovic, M.N., Gregory, D.J., Poznansky, M.C., et al. (2021). Multiple SARS-CoV-2 variants escape neutralization by vaccine-induced humoral immunity. *Cell* 184, 2372-2383 e2379. 10.1016/j.cell.2021.03.013.

653 Gotoh, S., Ito, I., Nagasaki, T., Yamamoto, Y., Konishi, S., Korogi, Y.,  
654 Matsumoto, H., Muro, S., Hirai, T., Funato, M., et al. (2014). Generation of  
655 alveolar epithelial spheroids via isolated progenitor cells from human pluripotent  
656 stem cells. *Stem Cell Reports* 3, 394-403. 10.1016/j.stemcr.2014.07.005.  
657 Ito, K., Piantam, C., and Nishiura, H. (2022). Estimating relative generation  
658 times and relative reproduction numbers of Omicron BA.1 and BA.2 with respect  
659 to Delta in Denmark. *MedRxiv*, doi:  
660 <https://doi.org/10.1101/2022.1103.1102.22271767>.  
661 Khan, K., Karim, F., Ganga, Y., Bernstein, M., Jule, Z., Reedoy, K., Cele, S.,  
662 Lustig, G., Amoako, D., Wolter, N., et al. (2022). Omicron sub-lineages  
663 BA.4/BA.5 escape BA.1 infection elicited neutralizing immunity. *MedRxiv*, doi:  
664 <https://doi.org/10.1101/2022.1104.1129.22274477>.  
665 Khare, S., Gurry, C., Freitas, L., Schultz, M.B., Bach, G., Diallo, A., Akite, N., Ho,  
666 J., Lee, R.T., Yeo, W., et al. (2021). GISAID's Role in Pandemic Response.  
667 *China CDC Wkly* 3, 1049-1051. 10.46234/ccdcw2021.255.  
668 Kimura, I., Kosugi, Y., Wu, J., Zahradnik, J., Yamasoba, D., Butlertanaka, E.P.,  
669 Tanaka, Y.L., Uriu, K., Liu, Y., Morizako, N., et al. (2022a). The SARS-CoV-2  
670 Lambda variant exhibits enhanced infectivity and immune resistance. *Cell Rep*  
671 38, 110218. 10.1016/j.celrep.2021.110218.  
672 Kimura, I., Yamasoba, D., Nasser, H., Zahradnik, J., Kosugi, Y., Wu, J., Nagata,  
673 K., Uriu, K., Tanaka, Y.L., Ito, J., et al. (2022b). SARS-CoV-2 spike S375F  
674 mutation characterizes the Omicron BA.1 variant. *BioRxiv*, doi:  
675 <https://doi.org/10.1101/2022.1104.1103.486864>.  
676 Kondo, N., Miyauchi, K., and Matsuda, Z. (2011). Monitoring viral-mediated  
677 membrane fusion using fluorescent reporter methods. *Curr Protoc Cell Biol*  
678 *Chapter* 26, Unit 26 29. 10.1002/0471143030.cb2609s50.  
679 Konishi, S., Gotoh, S., Tateishi, K., Yamamoto, Y., Korogi, Y., Nagasaki, T.,  
680 Matsumoto, H., Muro, S., Hirai, T., Ito, I., et al. (2016). Directed Induction of  
681 Functional Multi-ciliated Cells in Proximal Airway Epithelial Spheroids from  
682 Human Pluripotent Stem Cells. *Stem Cell Reports* 6, 18-25.  
683 10.1016/j.stemcr.2015.11.010.  
684 Kubota, M., Takeuchi, K., Watanabe, S., Ohno, S., Matsuoka, R., Kohda, D.,  
685 Nakakita, S.I., Hiramatsu, H., Suzuki, Y., Nakayama, T., et al. (2016).  
686 Trisaccharide containing alpha2,3-linked sialic acid is a receptor for mumps virus.  
687 *Proc Natl Acad Sci U S A* 113, 11579-11584. 10.1073/pnas.1608383113.  
688 Li, H. (2018). Minimap2: pairwise alignment for nucleotide sequences.  
689 *Bioinformatics* 34, 3094-3100. 10.1093/bioinformatics/bty191.  
690 Li, H., and Durbin, R. (2009). Fast and accurate short read alignment with  
691 Burrows-Wheeler transform. *Bioinformatics* 25, 1754-1760.  
692 10.1093/bioinformatics/btp324.  
693 Li, H., Handsaker, B., Wysoker, A., Fennell, T., Ruan, J., Homer, N., Marth, G.,



694 Abecasis, G., Durbin, R., and Genome Project Data Processing Subgroup  
695 (2009). The sequence alignment/map format and SAMtools. *Bioinformatics* 25,  
696 2078-2079. 10.1093/bioinformatics/btp352.

697 Liu, L., Iketani, S., Guo, Y., Chan, J.F.-W., Wang, M., Liu, L., Luo, Y., Chu, H.,  
698 Huang, Y., Nair, M.S., et al. (2021). Striking antibody evasion manifested by the  
699 Omicron variant of SARS-CoV-2. *Nature*, doi:  
700 <https://doi.org/10.1038/d41586-41021-03826-41583>.

701 Louca, S., and Doebeli, M. (2018). Efficient comparative phylogenetics on large  
702 trees. *Bioinformatics* 34, 1053-1055. 10.1093/bioinformatics/btx701.

703 Matsuyama, S., Nao, N., Shirato, K., Kawase, M., Saito, S., Takayama, I.,  
704 Nagata, N., Sekizuka, T., Katoh, H., Kato, F., et al. (2020). Enhanced isolation of  
705 SARS-CoV-2 by TMPRSS2-expressing cells. *Proc Natl Acad Sci U S A* 117,  
706 7001-7003. 10.1073/pnas.2002589117.

707 Meng, B., Abdullahi, A., Ferreira, I.A.T.M., Goonawardane, N., Saito, A., Kimura,  
708 I., Yamasoba, D., Gerber, P.P., Fatihi, S., Rathore, S., et al. (2022). Altered  
709 TMPRSS2 usage by SARS-CoV-2 Omicron impacts tropism and fusogenicity.  
710 *Nature*. 10.1038/s41586-022-04474-x.

711 Meng, B., Kemp, S.A., Papa, G., Datir, R., Ferreira, I., Marelli, S., Harvey, W.T.,  
712 Lytras, S., Mohamed, A., Gallo, G., et al. (2021). Recurrent emergence of  
713 SARS-CoV-2 spike deletion H69/V70 and its role in the Alpha variant B.1.1.7.  
714 *Cell Rep* 35, 109292. 10.1016/j.celrep.2021.109292.

715 Motozono, C., Toyoda, M., Zahradnik, J., Saito, A., Nasser, H., Tan, T.S., Ngare,  
716 I., Kimura, I., Uriu, K., Kosugi, Y., et al. (2021). SARS-CoV-2 spike L452R  
717 variant evades cellular immunity and increases infectivity. *Cell Host Microbe* 29,  
718 1124-1136. 10.1016/j.chom.2021.06.006.

719 NICD, S.A. (2021a). "Latest confirmed cases of COVID-19 in South Africa  
720 (November 25, 2021)".  
721 [https://www.nicd.ac.za/latest-confirmed-cases-of-covid-19-in-south-africa-25-no](https://www.nicd.ac.za/latest-confirmed-cases-of-covid-19-in-south-africa-25-november-2021/)  
722 [vember-2021/](https://www.nicd.ac.za/latest-confirmed-cases-of-covid-19-in-south-africa-25-november-2021/).

723 NICD, S.A. (2021b). "New COVID-19 variant detected in South Africa  
724 (November 25, 2021)".  
725 <https://www.nicd.ac.za/new-covid-19-variant-detected-in-south-africa/>.

726 Niwa, H., Yamamura, K., and Miyazaki, J. (1991). Efficient selection for  
727 high-expression transfectants with a novel eukaryotic vector. *Gene* 108, 193-199.  
728 10.1016/0378-1119(91)90434-d.

729 Ong, S.W.X., Chiew, C.J., Ang, L.W., Mak, T.M., Cui, L., Toh, M., Lim, Y.D., Lee,  
730 P.H., Lee, T.H., Chia, P.Y., et al. (2021). Clinical and virological features of  
731 SARS-CoV-2 variants of concern: a retrospective cohort study comparing  
732 B.1.1.7 (Alpha), B.1.315 (Beta), and B.1.617.2 (Delta). *Clin Infect Dis*.  
733 10.1093/cid/ciab721.

734 Ozono, S., Zhang, Y., Ode, H., Sano, K., Tan, T.S., Imai, K., Miyoshi, K.,

735 Kishigami, S., Ueno, T., Iwatani, Y., et al. (2021). SARS-CoV-2 D614G spike  
736 mutation increases entry efficiency with enhanced ACE2-binding affinity. *Nat*  
737 *Commun* 12, 848. 10.1038/s41467-021-21118-2.

738 Ozono, S., Zhang, Y., Tobiume, M., Kishigami, S., and Tokunaga, K. (2020).  
739 Super-rapid quantitation of the production of HIV-1 harboring a luminescent  
740 peptide tag. *J Biol Chem* 295, 13023-13030. 10.1074/jbc.RA120.013887.

741 Planas, D., Saunders, N., Maes, P., Guivel-Benhassine, F., Planchais, C.,  
742 Buchrieser, J., Bolland, W.-H., Porrot, F., Staropoli, I., Lemoine, F., et al. (2021).  
743 Considerable escape of SARS-CoV-2 Omicron to antibody neutralization.  
744 *Nature*, doi: <https://doi.org/10.1038/d41586-41021-03827-41582>.

745 Reed, L.J., and Muench, H. (1938). A simple method of estimating fifty percent  
746 endpoints. *Am J Hygiene* 27, 493-497.

747 Saito, A., Irie, T., Suzuki, R., Maemura, T., Nasser, H., Uriu, K., Kosugi, Y.,  
748 Shirakawa, K., Sadamasu, K., Kimura, I., et al. (2022). Enhanced fusogenicity  
749 and pathogenicity of SARS-CoV-2 Delta P681R mutation. *Nature* 602, 300-306.  
750 10.1038/s41586-021-04266-9.

751 Sheikh, A., McMenamin, J., Taylor, B., Robertson, C., Public Health, S., and the,  
752 E.I.I.C. (2021). SARS-CoV-2 Delta VOC in Scotland: demographics, risk of  
753 hospital admission, and vaccine effectiveness. *Lancet* 397, 2461-2462.  
754 10.1016/S0140-6736(21)01358-1.

755 Stamatakis, A. (2014). RAxML version 8: a tool for phylogenetic analysis and  
756 post-analysis of large phylogenies. *Bioinformatics* 30, 1312-1313.  
757 10.1093/bioinformatics/btu033.

758 Suzuki, R., Yamasoba, D., Kimura, I., Wang, L., Kishimoto, M., Ito, J., Morioka,  
759 Y., Nao, N., Nasser, H., Uriu, K., et al. (2022). Attenuated fusogenicity and  
760 pathogenicity of SARS-CoV-2 Omicron variant. *Nature*.  
761 10.1038/s41586-022-04462-1.

762 Takashita, E., Kinoshita, N., Yamayoshi, S., Sakai-Tagawa, Y., Fujisaki, S., Ito,  
763 M., Iwatsuki-Horimoto, K., Chiba, S., Halfmann, P., Nagai, H., et al. (2022a).  
764 Efficacy of antibodies and antiviral drugs against Covid-19 Omicron variant. *N*  
765 *Engl J Med*. 10.1056/NEJMc2119407.

766 Takashita, E., Kinoshita, N., Yamayoshi, S., Sakai-Tagawa, Y., Fujisaki, S., Ito,  
767 M., Iwatsuki-Horimoto, K., Halfmann, P., Watanabe, S., Maeda, K., et al. (2022b).  
768 Efficacy of Antiviral Agents against the SARS-CoV-2 Omicron Subvariant BA.2.  
769 *N Engl J Med* 386, 1475-1477. 10.1056/NEJMc2201933.

770 Tegally, H., Moir, M., Everatt, J., Giovanetti, M., Scheepers, C., Wilkinson, E.,  
771 Subramoney, K., Moyo, S., Amoako, D.G., Baxter, C., et al. (2022). Continued  
772 Emergence and Evolution of Omicron in South Africa: New BA.4 and BA.5  
773 lineages. *MedRxiv*, doi: <https://doi.org/10.1101/2022.1105.1101.22274406>.

774 Torii, S., Ono, C., Suzuki, R., Morioka, Y., Anzai, I., Fauzyah, Y., Maeda, Y.,  
775 Kamitani, W., Fukuhara, T., and Matsuura, Y. (2021). Establishment of a reverse

776 genetics system for SARS-CoV-2 using circular polymerase extension reaction.  
777 Cell Rep 35, 109014.

778 Twohig, K.A., Nyberg, T., Zaidi, A., Thelwall, S., Sinnathamby, M.A., Aliabadi, S.,  
779 Seaman, S.R., Harris, R.J., Hope, R., Lopez-Bernal, J., et al. (2022). Hospital  
780 admission and emergency care attendance risk for SARS-CoV-2 delta  
781 (B.1.617.2) compared with alpha (B.1.1.7) variants of concern: a cohort study.  
782 Lancet Infect Dis 22, 35-42. 10.1016/S1473-3099(21)00475-8.

783 UKHSA (2022). "SARS-CoV-2 variants of concern and variants under  
784 investigation in England. Technical briefing 35 (January 28, 2022)".  
785 [https://assets.publishing.service.gov.uk/government/uploads/system/uploads/att](https://assets.publishing.service.gov.uk/government/uploads/system/uploads/attachment_data/file/1050999/Technical-Briefing-35-28January2022.pdf)  
786 [achment\\_data/file/1050999/Technical-Briefing-35-28January2022.pdf](https://assets.publishing.service.gov.uk/government/uploads/system/uploads/attachment_data/file/1050999/Technical-Briefing-35-28January2022.pdf).

787 Uraki, R., Kiso, M., Iida, S., Imai, M., Takashita, E., Kuroda, M., Halfmann, P.J.,  
788 Loeber, S., Maemura, T., Yamayoshi, S., et al. (2022). Characterization and  
789 antiviral susceptibility of SARS-CoV-2 Omicron/BA.2. Nature.  
790 10.1038/s41586-022-04856-1.

791 Uriu, K., Cardenas, P., Munoz, E., Barragan, V., Kosugi, Y., Shirakawa, K.,  
792 Takaori-Kondo, A., Sato, K., Ecuador-Covid19 Consortium, and The Genotype  
793 to Phenotype Japan (G2P-Japan) Consortium (2022). Characterization of the  
794 immune resistance of SARS-CoV-2 Mu variant and the robust immunity induced  
795 by Mu infection. J Infect Dis. 10.1093/infdis/jiac053.

796 Uriu, K., Kimura, I., Shirakawa, K., Takaori-Kondo, A., Nakada, T.A., Kaneda, A.,  
797 Nakagawa, S., Sato, K., and The Genotype to Phenotype Japan (G2P-Japan)  
798 Consortium (2021). Neutralization of the SARS-CoV-2 Mu variant by  
799 convalescent and vaccine serum. N Engl J Med 385, 2397-2399.  
800 10.1056/NEJMc2114706.

801 VanBlargan, L.A., Errico, J.M., Halfmann, P.J., Zost, S.J., Crowe, J.E., Jr.,  
802 Purcell, L.A., Kawaoka, Y., Corti, D., Fremont, D.H., and Diamond, M.S. (2022).  
803 An infectious SARS-CoV-2 B.1.1.529 Omicron virus escapes neutralization by  
804 therapeutic monoclonal antibodies. Nat Med. 10.1038/s41591-021-01678-y.

805 WHO (2022). "Tracking SARS-CoV-2 variants (May 18, 2022)"  
806 <https://www.who.int/en/activities/tracking-SARS-CoV-2-variants>.

807 Yamamoto, M., Kiso, M., Sakai-Tagawa, Y., Iwatsuki-Horimoto, K., Imai, M.,  
808 Takeda, M., Kinoshita, N., Ohmagari, N., Gohda, J., Semba, K., et al. (2020).  
809 The Anticoagulant Nafamostat Potently Inhibits SARS-CoV-2 S  
810 Protein-Mediated Fusion in a Cell Fusion Assay System and Viral Infection In  
811 Vitro in a Cell-Type-Dependent Manner. Viruses 12. 10.3390/v12060629.

812 Yamamoto, Y., Gotoh, S., Korogi, Y., Seki, M., Konishi, S., Ikeo, S., Sone, N.,  
813 Nagasaki, T., Matsumoto, H., Muro, S., et al. (2017). Long-term expansion of  
814 alveolar stem cells derived from human iPS cells in organoids. Nat Methods 14,  
815 1097-1106. 10.1038/nmeth.4448.

816 Yamasoba, D., Kimura, I., Nasser, H., Morioka, Y., Nao, N., Ito, J., Uriu, K.,

817 Tsuda, M., Zahradnik, J., Shirakawa, K., et al. (2022a). Virological  
818 characteristics of the SARS-CoV-2 Omicron BA.2 spike. *Cell*.  
819 10.1016/j.cell.2022.04.035.

820 Yamasoba, D., Kosugi, Y., Kimura, I., Fujita, S., Uriu, K., Ito, J., Sato, K., and  
821 Consortium, T.G.t.P.J.G.P.-J. (2022b). Sensitivity of novel SARS-CoV-2  
822 Omicron subvariants, BA.2.11, BA.2.12.1, BA.4 and BA.5 to therapeutic  
823 monoclonal antibodies. *BioRxiv*, doi:  
824 <https://doi.org/10.1101/2022.1105.1103.490409>.

825 Zahradnik, J., Dey, D., Marciano, S., Kolarova, L., Charendoff, C.I., Subtil, A.,  
826 and Schreiber, G. (2021a). A Protein-Engineered, Enhanced Yeast Display  
827 Platform for Rapid Evolution of Challenging Targets. *ACS Synth Biol* 10,  
828 3445-3460. 10.1021/acssynbio.1c00395.

829 Zahradnik, J., Marciano, S., Shemesh, M., Zoler, E., Harari, D., Chiaravalli, J.,  
830 Meyer, B., Rudich, Y., Li, C., Marton, I., et al. (2021b). SARS-CoV-2 variant  
831 prediction and antiviral drug design are enabled by RBD in vitro evolution. *Nat*  
832 *Microbiol* 6, 1188-1198. 10.1038/s41564-021-00954-4.

833

834

## 835 **Figure legends**

836

### 837 **Figure 1. Epidemic of the BA.2-related Omicron variants bearing the S** 838 **L452R/Q/M mutations.**

839 (A) A maximum likelihood (ML) tree of the Omicron lineages sampled from  
840 South Africa. The mutations acquired in the S proteins of BA.4 and BA.5  
841 lineages are indicated in the panel. Note that R493Q is a reversion [i.e., back  
842 mutation from the BA.1–BA.3 lineages (R493) to the B.1.1 lineage (Q493)].  
843 Bootstrap values, \*,  $\geq 0.85$ ; \*\*,  $\geq 0.9$ .

844 (B) An ML tree of BA.2. The BA.2 variants bearing mutations at the S L452  
845 residue are indicated as colored dots, and the estimated common ancestry  
846 groups of the variants are indicated as vertical bars. The PANGO lineages are  
847 indicated in the panel. The mutations in the S proteins of each group are shown  
848 in parentheses.

849 (C) Heatmap summarizing the frequency of amino acid substitutions.  
850 Substitutions detected in > 50% of sequences of any lineage are shown.

851 (D) Estimated relative  $R_e$  of each viral lineage, assuming a fixed generation time  
852 of 2.1 days. The  $R_e$  value of BA.2 is set at 1. Posterior (violin), posterior mean  
853 (dot), and 95% confidential interval (CI) (line) are shown.

854 (E) Epidemic dynamics of SARS-CoV-2 lineages. The results for up to five  
855 predominant lineages in South Africa (top) and the USA (bottom) are shown.  
856 The observed daily sequence frequency (dot) and the dynamics (posterior mean,  
857 line; 95% CI, ribbon) are shown. The dot size is proportional to the number of  
858 sequences. The BA.2 sublineages without mutations at the S L452 residue are  
859 summarized as “BA.2”.

860 See also **Figure S1 and Tables S1–S4.**

861

### 862 **Figure 2. Immune resistance of the L452R/Q/M-bearing BA.2-related** 863 **Omicron variants.**

864 Neutralization assays were performed with pseudoviruses harboring the S  
865 proteins of B.1.1 (the D614G-bearing ancestral virus), BA.1, BA.2 and the  
866 L452R/Q/M-bearing BA.2-related Omicron variants and the following sera.

867 (A and B) Convalescent sera from individuals infected with BA.1 [14 not fully  
868 vaccinated donors (A) and 16 2/3-dose vaccinated donors (B)].

869 (C and D) Convalescent sera from individuals infected with BA.2 [9 not fully  
870 vaccinated donors (C) and 7 2/3-dose vaccinated donors (D)].

871 (E) Sera from BA.2-infected hamsters at 16 d.p.i. (6 hamsters).

872 (F) Sera from mice immunized with BA.2 S RBD (4 mice).

873 Assays with each serum sample were performed in triplicate to determine the  
874 50% neutralization titer (NT50). Each dot represents one NT50 value, and the  
875 geometric mean and 95% CI are shown. The numbers indicate the fold changes

876 of resistance versus each antigenic variant. The horizontal dashed line indicates  
877 the detection limit (120-fold). Statistically significant differences between BA.2  
878 and other variants (\*,  $P < 0.05$ ) were determined by two-sided Wilcoxon  
879 signed-rank tests. Information on the vaccinated/convalescent donors is  
880 summarized in **Table S5**.

881 See also **Table S5**.

882

### 883 **Figure 3. Virological features of the L452R/Q/M-bearing BA.2-related** 884 **Omicron S**

885 **(A)** Pseudovirus assay. The percent infectivity compared to that of the virus  
886 pseudotyped with BA.2 S are shown.

887 **(B)** Binding affinity of SARS-CoV-2 S RBD to ACE2 by yeast surface display.  
888 The KD value indicating the binding affinity of the SARS-CoV-2 S RBD  
889 expressed on yeast binding to soluble ACE2 is shown.

890 **(C and D)** S-based fusion assay. **(C)** S expression on the cell surface.  
891 Representative histograms stained with an anti-S1/S2 polyclonal antibody are  
892 shown in **Figure S2B**, and the summarized data are shown. In the left panel, the  
893 number in the histogram indicates mean fluorescence intensity (MFI). Gray  
894 histograms indicate isotype controls. **(D)** S-based fusion assay in Calu-3 cells.  
895 The recorded fusion activity (arbitrary units) is shown. The dashed green line  
896 indicates the results of BA.2.

897 Assays were performed in quadruplicate (**A and D**) or triplicate (**B and C**), and  
898 the presented data are expressed as the average  $\pm$  SD. Each dot indicates the  
899 result of an individual replicate. In **A–C**, statistically significant differences  
900 between BA.2 and other variants (\*,  $P < 0.05$  in **C**) were determined by  
901 two-sided Student's  $t$  tests. In **D**, statistically significant differences between  
902 BA.2 and other variants across timepoints were determined by multiple  
903 regression. FWERs calculated using the Holm method are indicated in the  
904 figures.

905 See also **Figure S2**.

906

### 907 **Figure 4. Growth capacity of the L452R/Q/M-bearing BA.2-related Omicron** 908 **variants in vitro**

909 **(A)** Scheme for the chimeric recombinant SARS-CoV-2 used in this study. The  
910 SARS-CoV-2 genome and its genes are shown. Left, the lineage A-based  
911 recombinant viruses. The template is SARS-CoV-2 strain WK-521 (PANGO  
912 lineage A, GISAID ID: EPI\_ISL\_408667), and the S genes were swapped with  
913 those of BA.2-related Omicron variants. *ORF7a* was swapped with the *sfGFP*  
914 gene. Right, the lineage BA.2-based recombinant viruses. The template is  
915 SARS-CoV-2 strain TY40-385 (PANGO lineage BA.2, GISAID ID:  
916 EPI\_ISL\_9595859), and the S genes were swapped with those of BA.2-related



Omicron variants. The mutations based on the BA.2 S are summarized in parentheses. Note that the nucleotide sequences of two BA.2 isolates (GISAID IDs: EPI\_ISL\_8346921 and EPI\_ISL\_9595859) are identical.

**(B and C)** Plaque assay. The lineage A-based **(B)** and lineage BA.2-based **(C)** recombinant viruses were respectively used, and VeroE6/TMPRSS2 cells were used for the target cells. Representative panels and summary of the recorded plaque diameters (20 plaques per virus) (most right) are shown.

**(D-I)** Growth kinetics of chimeric recombinant SARS-CoV-2. Vero cells **(D and F)**, VeroE6/TMPRSS2 cells **(E and G)**, human iPSC-derived airway epithelial cells **(H)** and alveolar epithelial cells **(I)** were infected with the lineage A-based **(D and E)** and BA.2-based **(F-I)** chimeric recombinant SARS-CoV-2, and the copy numbers of viral RNA in the culture supernatant were routinely quantified by RT-qPCR. The dashed green line indicates the results of BA.2.

In **B and C** (most right panels), each dot indicates the result of an individual plaque, and the presented data are expressed as the average  $\pm$  SD. Statistically significant differences between BA.1 and BA.2 (\*,  $P < 0.05$ ) were determined by two-sided Mann–Whitney  $U$  tests.

In **D-I**, assays were performed in quadruplicate, and the presented data are expressed as the average  $\pm$  SD. Statistically significant differences between BA.2 and other variants across timepoints were determined by multiple regression. FWERs calculated using the Holm method are indicated in the figures.

# **Figure 5. Virological features of BA.2.12.1 and BA.4/5 in vivo**

Syrian hamsters were intranasally inoculated with rBA.2, rBA.2.12.1 and rBA.4/5 (summarized in **Figure 4A, right**).

**(A)** Body weight, Penh, Rpef, and SpO<sub>2</sub> values were routinely measured. Hamsters of the same age were intranasally inoculated with saline (uninfected).

**(B)** Viral RNA loads in the oral swab (top), lung hilum (middle) and lung periphery (bottom).

**(C)** Viral titers in the lung periphery.

**(D)** IHC of the viral N protein in the lungs at 1, 3 and 5 d.p.i of all infected hamsters (n = 4 per viral strain).

**(E)** Percentage of N-positive cells in whole lung lobes at 3 d.p.i. The raw data are shown in **Figure S3B**.

**(F and G)** **(F)** Histopathological scoring of lung lesions. Representative pathological features are reported in our previous studies ([Saito et al., 2022](#); [Suzuki et al., 2022](#); [Yamasoba et al., 2022a](#)). **(G)** H&E staining of the lungs of infected hamsters. Uninfected lung alveolar space and bronchioles are also shown.

957 (H) Type II pneumocytes in the lungs of infected hamsters. The percentage of  
 958 the area of type II pneumocytes in the lung at 5 d.p.i. is shown. The raw data are  
 959 shown in **Figure S3C**.  
 960 Data are presented as the average (**A and B, top**, 6 hamsters per viral strain; **B,**  
 961 **middle and bottom, C, E, F and H**, 4 hamsters per viral strain)  $\pm$  SEM. In **E** and  
 962 **H**, each dot indicates the result of an individual hamster.  
 963 In **A–C and F**, statistically significant differences between rBA.2 and other  
 964 variants across timepoints were determined by multiple regression. The 0 d.p.i.  
 965 data were excluded from the analyses. FWERs calculated using the Holm  
 966 method are indicated in the figures.  
 967 In **E and H**, the statistically significant differences between rBA.2 and other  
 968 variants were determined by a two-sided Mann–Whitney *U* test.  
 969 In **D and G**, each panel shows a representative result from an individual infected  
 970 hamster. Scale bars, 100  $\mu$ m.  
 971 See also **Figure S3**.

972 **Table S1.** Summary of the mutations among Wuhan-Hu-1, original BA.2 and  
973 BA.2-related Omicron variants, related to Figure 1.

974

975 **Table S2.** The estimated common ancestry groups of BA.2 variants bearing the  
976 S L452 mutations, related to Figure 1.

977

978 **Table S3.** The estimated relative  $R_e$  values of viral lineages in each country,  
979 related to Figure 1.

980

981 **Table S4.** The detected sequence numbers of the BA.2-related Omicron  
982 lineages bearing the L452R/Q/M mutations in each country, related to Figure 1.

983

984 **Table S5.** Human sera used in this study, related to Figure 2.

985

986 **Table S6.** Primers used in this study, related to Figures 2–5.

987

988 **Table S7.** Summary of unexpected amino acid mutations detected in the  
989 working virus stocks, related to Figures 4-5.

990

991 **Figure S1. Phylogenetic analysis of the BA.2-related Omicron variants,**  
992 **related to Figure 1.**

993 (A) The mutation profile of Omicron lineages in South Africa, related to **Figure**  
994 **1A.** Mutations detected in  $\geq 5$  sequences in the ML tree are summarized.

995 (B) The country and PANGO lineage of the BA.2 sequences in the ML tree,  
996 related to **Figure 1B.**

997 (C) Estimation of each common ancestry group of the S L452 mutation-bearing  
998 BA.2 variants. Amino acid at position 452 in S in each ancestral node was  
999 estimated by a Markov model, and the branches where the L452 mutation was  
1000 acquired (red branches with asterisks) was estimated.

1001 (D) Epidemic dynamics of SARS-CoV-2 lineages. The results for up to five  
1002 predominant lineages in Denmark (left), France (middle) and Belgium (right)  
1003 where the BA.2-related Omicron variants bearing the S L452R/Q/M mutations  
1004 circulating are shown. The observed daily sequence frequency (dot) and the  
1005 dynamics (posterior mean, line; 95% CI, ribbon) are shown. The dot size is  
1006 proportional to the number of sequences. The BA.2 sublineages without  
1007 mutations at the S L452 residue are summarized as “BA.2”.

1008

1009 **Figure S2. Virological features of BA.2 in vitro, related to Figure 3.**

1010 (A) Fold increase in pseudovirus infectivity based on TMPRSS2 expression.

1011 (B) S expression on the cell surface. Representative histograms stained with an  
1012 anti-S1/S2 polyclonal antibody are shown. The number in the histogram

1013 indicates MFI. Gray histograms indicate isotype controls. The summarized data  
1014 are shown in **Figure 3C**.

1015 **(C)** S-based fusion assay in VeroE6/TMPRSS2 cells. The recorded fusion  
1016 activity (arbitrary units) is shown. The dashed green line indicates the results of  
1017 BA.2.

1018 **(D)** Coculture of S-expressing cells with HEK293-ACE2/TMPRSS2 cells. Left,  
1019 representative images of S-expressing cells cocultured with HEK293 cells (top)  
1020 or HEK293-ACE2/TMPRSS2 cells (bottom). Nuclei were stained with Hoechst  
1021 33342 (blue). Right, size distribution of syncytia (green). The numbers in  
1022 parentheses indicate the numbers of GFP-positive syncytia counted. Scale bars,  
1023 200  $\mu$ m.

1024 In **A and C**, assays were performed in quadruplicate, and the presented data are  
1025 expressed as the average  $\pm$  SD. In **A and D**, each dot indicates the result of an  
1026 individual replicate.

1027 In **C**, statistically significant differences between BA.2 and other variants across  
1028 timepoints were determined by multiple regression. FWERs calculated using the  
1029 Holm method are indicated in the figures.

1030 In **D**, statistically significant differences between BA.2 and other variants (\*,  $P <$   
1031 0.05) were determined by two-sided Mann–Whitney  $U$  tests.

1032

1033 **Figure S3. Virological features of BA.2.12.1 and BA.4/5 in vivo, related to**  
1034 **Figure 5.**

1035 **(A)** IHC of the viral N protein in the middle portion of the tracheas of all infected  
1036 hamsters ( $n = 4$  per viral strain) at 1 d.p.i. Each panel shows a representative  
1037 result from an individual infected hamster.

1038 **(B)** Right lung lobes of hamsters infected with rBA.2, rBA.2.12.1 or rBA.4/5 ( $n =$   
1039 4 per viral strain) at 3 d.p.i. were immunohistochemically stained with an  
1040 anti-SARS-CoV-2 N monoclonal antibody. In each panel, IHC staining (top) and  
1041 the digitalized N-positive area (bottom, indicated in red) are shown. The number  
1042 in the bottom panel indicates the percentage of the N-positive area. Summarized  
1043 data are shown in **Figure 5E**.

1044 **(C)** Type II pneumocytes in the lungs of infected hamsters. Right lung lobes of  
1045 hamsters infected with rBA.2, rBA.2.12.1 or rBA.4/5 ( $n = 4$  per viral strain) at 5  
1046 d.p.i. In each panel, H&E staining (top) and the digitalized inflammation area  
1047 (bottom, indicated in red) are shown. The number in the bottom panel indicates  
1048 the percentage of the section represented by the indicated area (i.e., the area  
1049 indicated in red within the total area of the lung lobe). Summarized data are  
1050 shown in **Figure 5H**.

1051 Scale bars, 1 mm.

## 1052 **STAR<sup>®</sup>METHODS**

1053

## 1054 **KEY RESOURCES TABLE**

## 1055 **RESOURCE AVAILABILITY**

### 1056 **Lead Contact**

1057 Further information and requests for resources and reagents should be directed  
1058 to and will be fulfilled by the Lead Contact, Kei Sato  
1059 ([KeiSato@g.ecc.u-tokyo.ac.jp](mailto:KeiSato@g.ecc.u-tokyo.ac.jp)).

1060

### 1061 **Materials Availability**

1062 All unique reagents generated in this study are listed in the Key Resources  
1063 Table and available from the Lead Contact with a completed Materials Transfer  
1064 Agreement.

1065

### 1066 **Data and Software Availability**

1067 The raw data of virus sequences analyzed in this study are deposited in the  
1068 GitHub repository ([https://github.com/TheSatoLab/BA.2\\_related\\_Omicrons](https://github.com/TheSatoLab/BA.2_related_Omicrons)). All  
1069 databases/datasets used in this study are available from GISAID database  
1070 (<https://www.gisaid.org>) and GenBank database  
1071 (<https://www.ncbi.nlm.nih.gov/genbank/>). The accession numbers of viral  
1072 sequences used in this study are listed in STAR<sup>®</sup>METHODS.

1073 The computational codes used in the present study are available in the  
1074 GitHub repository ([https://github.com/TheSatoLab/BA.2\\_related\\_Omicrons](https://github.com/TheSatoLab/BA.2_related_Omicrons)).

1075

## 1076 **EXPERIMENTAL MODEL AND SUBJECT DETAILS**

### 1077 **Ethics statement**

1078 All experiments with hamsters were performed in accordance with the Science  
1079 Council of Japan's Guidelines for the Proper Conduct of Animal Experiments.  
1080 The protocols were approved by the Institutional Animal Care and Use  
1081 Committee of National University Corporation Hokkaido University (approval ID:  
1082 20-0123 and 20-0060). All experiments with mice were also performed in  
1083 accordance with the Science Council of Japan's Guidelines for the Proper  
1084 Conduct of Animal Experiments. The protocols were approved by the  
1085 Institutional Animal Experiment Committee of The Institute of Medical Science,  
1086 The University of Tokyo (approval ID: PA21-39 and PA21-46). All protocols  
1087 involving specimens from human subjects recruited at Kyoto University and  
1088 Kuramochi Clinic Interpark were reviewed and approved by the Institutional  
1089 Review Boards of Kyoto University (approval ID: G1309) and Kuramochi Clinic  
1090 Interpark (approval ID: G2021-004). All human subjects provided written  
1091 informed consent. All protocols for the use of human specimens were reviewed  
1092 and approved by the Institutional Review Boards of The Institute of Medical

Science, The University of Tokyo (approval IDs: 2021-1-0416 and 2021-18-0617), Kyoto University (approval ID: G0697), Kumamoto University (approval IDs: 2066 and 2074), and University of Miyazaki (approval ID: O-1021).

# **Human serum collection**

Convalescent sera were collected from the following donors: vaccine-naïve individuals who had been infected with the Omicron BA.1 variant (n = 14; average age: 44, range: 16–73, 57% male), fully vaccinated individuals who had been infected with the Omicron BA.1 variant (n = 16; average age: 48, range: 20–76, 44% male), vaccine-naïve individuals who had been infected with the Omicron BA.2 variant (n = 9; average age: 34, range: 7–54, 44% male), and fully vaccinated individuals who had been infected with the Omicron BA.2 variant (n = 7; average age: 48, range: 29–71, 86% male). To identify the SARS-CoV-2 variants infecting patients, saliva was collected from COVID-19 patients during infection onset, and RNA was extracted using a QIAamp viral RNA mini kit (Qiagen, Cat# 52906) according to the manufacturer's protocol. To detect the S E484A mutation (common in all Omicron variants including BA.1, BA.2 and the L452R/Q/M-bearing BA.2-related variants), a primer/probe E484A (SARS-CoV-2) (Takara, Cat# RC322A) was used. To detect the S R214EPE insertion (specific to BA.1, while undetectable in BA.2 and the L452R/Q/M-bearing BA.2-related variants), an in-house-developed protocol was used with the following primers and probe: Omi\_ins214s-F1, 5'-TTC TAA GCA CAC GCC TAT TAT AGT GC-3'; Omi\_ins214s-R1, 5'-TAA AGC CGA AAA ACC CTG AGG-3'; and Omi\_ins214s, FAM-TGA GCC AGA AGA TC-MGB (Yamasoba *et al.*, 2022a). To verify the absence of S L452R/Q/M mutation (specific to the L452R/Q/M-bearing BA.2-related variants, while undetectable in original BA.2), a L452R (SARS-CoV-2) primer/probe set v2 (Takara, Cat# RC346A) was used. Sera were inactivated at 56°C for 30 minutes and stored at –80°C until use. The details of the convalescent sera are summarized in **Table S5**.

# **Cell culture**

HEK293T cells (a human embryonic kidney cell line; ATCC, CRL-3216), HEK293 cells (a human embryonic kidney cell line; ATCC, CRL-1573) and HOS-ACE2/TMPRSS2 cells (HOS cells stably expressing human ACE2 and TMPRSS2) (Ferreira *et al.*, 2021; Ozono *et al.*, 2021) were maintained in DMEM (high glucose) (Sigma-Aldrich, Cat# 6429-500ML) containing 10% fetal bovine serum (FBS, Sigma-Aldrich Cat# 172012-500ML), and 1% penicillin-streptomycin (PS) (Sigma-Aldrich, Cat# P4333-100ML). HEK293-ACE2 cells (HEK293 cells stably expressing human ACE2) (Motozono



1134 *et al.*, 2021) was maintained in DMEM (high glucose) containing 10% FBS, 1  
1135 µg/ml puromycin (InvivoGen, Cat# ant-pr-1) and 1% PS. HEK293-ACE2/TMPRSS2 cells (HEK293 cells stably expressing human ACE2  
1136 and TMPRSS2) (Motozono *et al.*, 2021) was maintained in DMEM (high  
1137 glucose) containing 10% FBS, 1 µg/ml puromycin, 200 ng/ml hygromycin  
1138 (Nacalai Tesque, Cat# 09287-84) and 1% PS. HEK293-C34 cells (*IFNAR1* KO  
1139 HEK293 cells expressing human ACE2 and TMPRSS2 by doxycycline  
1140 treatment) (Torii *et al.*, 2021) were maintained in DMEM (high glucose)  
1141 containing 10% FBS, 10 µg/ml blasticidin (InvivoGen, Cat# ant-bl-1) and 1% PS.  
1142 Vero cells [an African green monkey (*Chlorocebus sabaeus*) kidney cell line;  
1143 JCRB Cell Bank, JCRB0111] were maintained in Eagle's minimum essential  
1144 medium (EMEM) (Sigma-Aldrich, Cat# M4655-500ML) containing 10% FBS and  
1145 1% PS. VeroE6/TMPRSS2 cells (VeroE6 cells stably expressing human  
1146 TMPRSS2; JCRB Cell Bank, JCRB1819) (Matsuyama *et al.*, 2020) were  
1147 maintained in DMEM (low glucose) (Wako, Cat# 041-29775) containing 10%  
1148 FBS, G418 (1 mg/ml; Nacalai Tesque, Cat# G8168-10ML) and 1% PS. Calu-3  
1149 cells (a human lung epithelial cell line; ATCC, HTB-55) were maintained in  
1150 EMEM (Sigma-Aldrich, Cat# M4655-500ML) containing 20% FBS and 1% PS.  
1151 Calu-3/DSP<sub>1-7</sub> cells (Calu-3 cells stably expressing DSP<sub>1-7</sub>) (Yamamoto *et al.*,  
1152 2020) were maintained in EMEM (Wako, Cat# 056-08385) containing 20% FBS  
1153 and 1% PS. 293S GnTI(-) cells (HEK293S cells lacking  
1154 N-acetylglucosaminyltransferase (Kubota *et al.*, 2016) were maintained in  
1155 DMEM (Nacalai tesque, #08458-16 containing 2% FBS without PS. Expi293F  
1156 cells (Thermo Fisher Scientific, Cat# A14527) were maintained in Expi293  
1157 expression medium (Thermo Fisher Scientific, Cat# A1435101). Human airway  
1158 and alveolar epithelial cells derived from human induced pluripotent stem cells  
1159 (iPSCs) were manufactured according to established protocols as described  
1160 below (see "Preparation of human airway and alveolar epithelial cells from  
1161 human iPSCs" section) and provided by HiLung Inc.  
1162

1163

## 1164 **METHOD DETAILS**

### 1165 **Viral genome sequencing**

1166 Viral genome sequencing was performed as previously described (Meng *et al.*,  
1167 2022; Motozono *et al.*, 2021; Saito *et al.*, 2022; Suzuki *et al.*, 2022; Yamasoba *et al.*,  
1168 2022a). Briefly, the virus sequences were verified by viral RNA-sequencing  
1169 analysis. Viral RNA was extracted using a QIAamp viral RNA mini kit (Qiagen,  
1170 Cat# 52906). The sequencing library employed for total RNA sequencing was  
1171 prepared using the NEB next ultra RNA library prep kit for Illumina (New England  
1172 Biolabs, Cat# E7530). Paired-end 76-bp sequencing was performed using a  
1173 MiSeq system (Illumina) with MiSeq reagent kit v3 (Illumina, Cat# MS-102-3001).  
1174 Sequencing reads were trimmed using fastp v0.21.0 (Chen *et al.*, 2018) and

subsequently mapped to the viral genome sequences of a lineage A isolate (strain WK-521; GISAID ID: EPI\_ISL\_408667) (Matsuyama *et al.*, 2020) using BWA-MEM v0.7.17 (Li and Durbin, 2009). Variant calling, filtering, and annotation were performed using SAMtools v1.9 (Li *et al.*, 2009) and snpEff v5.0e (Cingolani *et al.*, 2012).

# **Phylogenetic and comparative genome analyses**

To construct an ML tree of Omicron lineages (BA.1–BA.5) sampled from South Africa (shown in **Figure 1A**), the genome sequence data of SARS-CoV-2 and its metadata were downloaded from the GISAID database (<https://www.gisaid.org/>) (Khare *et al.*, 2021) on April 23, 2022. We excluded the data of viral strains with the following features from the analysis: i) a lack collection date information; ii) sampling from animals other than humans, iii) >2% undetermined nucleotide characters, or iv) sampling by quarantine. From each viral lineage, 30 sequences were randomly sampled and used for tree construction, in addition to an outgroup sequence, EPI\_ISL\_466615, representing the oldest isolate of B.1.1 obtained in the UK. The viral genome sequences were mapped to the reference sequence of Wuhan-Hu-1 (GenBank accession number: NC\_045512.2) using Minimap2 v2.17 (Li, 2018) and subsequently converted to a multiple sequence alignment according to the GISAID phylogenetic analysis pipeline (<https://github.com/roblanf/sarscov2phylo>). The alignment sites corresponding to the 1–265 and 29674–29903 positions in the reference genome were masked (i.e., converted to NNN). Alignment sites at which >50% of sequences contained a gap or undetermined/ambiguous nucleotide were trimmed using trimAl v1.2 (Capella-Gutierrez *et al.*, 2009). Phylogenetic tree construction was performed via a three-step protocol: i) the first tree was constructed; ii) tips with longer external branches (Z score > 4) were removed from the dataset; iii) and the final tree was constructed. Tree reconstruction was performed by RAxML v8.2.12 (Stamatakis, 2014) under the GTRCAT substitution model. The node support value was calculated by 100 times bootstrap analysis.

To classify the BA.2 variants bearing mutations at the S L452 residue, we constructed an ML tree of BA.2 variants including those bearing mutations at the S L452 residue (shown in **Figure 1B**). For quality control, the BA.2 sequences without the S:N501Y and S:E484A mutations, characteristic mutations of Omicron, were removed from the dataset. Also, the BA.2 sequences with the S:HV69-70del mutation, a deletion mutation that is not present in BA.2 but in other Omicron lineages, were removed. To make a subset of BA.2 sequences representing the diversity of BA.2 for tree construction, we defined the “common amino acid haplotype” of BA.2 as described below. We first extracted the BA.2 sequences bearing mutations at position 452 in S. In

these BA.2 variants, amino acid mutations (including substitutions, insertions, and deletions) present > 1% sequences were detected and referred to as the "common amino acid mutations". According to the profile of the common amino acid mutations, a common amino acid haplotype, a set of common amino acid mutations present in each sequence, was determined for all BA.2 sequences. Finally, up to 20 sequences were randomly sampled from each unique common amino acid haplotype. As outgroup sequences, the oldest isolate of B.1.1 obtained in the UK (EPI\_ISL\_466615) and the oldest five BA.1 and BA.3 sequences sampled from South Africa after December 1, 2022, were used. The ML tree was constructed by the procedure described above. In the final set, 8,029 BA.2 sequences were included. Outgroup sequences are not displayed in **Figure 1B**.

### **Definition of common ancestry groups of the BA.2 variants bearing mutations at position 452 in S**

According to the phylogenetic tree of BA.2 shown in **Figure 1B**, we defined common ancestry groups of the BA.2 variants bearing mutations at position 452 in S as the follow procedures. First, the ancestral state of the amino acid at position 452 in S at each node was estimated using a fixed-rates continuous-time Markov model (Mk model) implemented in the R package "castor" (**Figure S1C**) (Louca and Doebeli, 2018). As a type of transition matrix in the Mk model, all rate different (ARD) matrix was selected. Second, we identified the branches connecting the parental-state (L) nodes and the mutated-state (R, Q, or M) nodes (red branches in **Figure S1C**). In these branches, it is expected that the mutation acquisitions in the S L452 residue occurred. Finally, we counted the descendant sequences of respective branches where the mutations in the S L452 were likely acquired. If the number of descendants is  $\geq 10$ , we defined these descendant sequences as a common ancestry group of the BA.2 variants, which bears a mutation at position 452 in S. Information of the common ancestry group is summarized in **Table S2**.

### **Modeling the epidemic dynamics of SARS-CoV-2 lineages**

To quantify the spread rate of each SARS-CoV-2 lineage in the human population, we estimated the relative effective reproduction number of each viral lineage according to the epidemic dynamics, calculated on the basis of viral genomic surveillance data. The data were downloaded from the GISAID database (<https://www.gisaid.org/>) on May 15, 2022. We excluded the data of viral strains with the following features from the analysis: i) a lack of collection date information; ii) sampling in animals other than humans; or iii) sampling by quarantine. We analyzed the datasets of the five countries (South Africa, the USA, France, Denmark and Belgium) where BA.4/5, BA.2.12.1, BA.2.11,

1257 BA.2.9.1, and BA.2.13 were most detected, respectively (**Table S4**). The BA.2  
1258 sublineages without amino acid mutations at position 452 in S were summarized  
1259 as BA.2. In addition, the Delta sublineages were also summarized as Delta. The  
1260 dynamics of up to five most predominant viral lineages in each country from  
1261 February 5, 2022, to May 15, 2022, were analyzed. The number of viral  
1262 sequences of each viral lineage collected on each day in each country was  
1263 counted, and the count matrix was constructed as an input for the statistical  
1264 model below.

1265 We constructed a Bayesian statistical model to represent relative  
1266 lineage growth dynamics with multinomial logistic regression, as described in our  
1267 previous study ([Suzuki et al., 2022](#)). In the present study, the epidemic dynamics  
1268 in respective countries were independently estimated. Arrays in the model index  
1269 over one or more indices: viral lineages  $l$  and days  $t$ . The model is:

1270

$$\begin{aligned}\mu_{lt} &= \alpha_l + \beta_l t \\ \theta_t &= \text{softmax}(\mu_t) \\ y_{lt} &\sim \text{Multinomial}\left(\sum_l y_{lt}, \theta_t\right)\end{aligned}$$

1271 The explanatory variable was time,  $t$ , and the outcome variable was  $y_{lt}$ , which  
1272 represented the count of viral lineage  $l$  at time  $t$ . In the model, the linear  
1273 estimator  $\mu_t$ , consisting of the intercept  $\alpha_l$  and the slope  $\beta_l$ , was converted to  
1274 the simplex  $\theta_t$ , which represented the probability of occurrence of each viral  
1275 lineage at time  $t$ , based on the softmax link function defined as:

$$\text{softmax}(x) = \frac{\exp(x)}{\sum_i \exp(x_i)}$$

1276  $y_{lt}$  is generated from  $\theta_t$  and the total count of all lineages at time  $t$  according  
1277 to a multinomial distribution.

1278 The relative  $R_e$  of each viral lineage ( $r_l$ ) was calculated according to the  
1279 slope parameter  $\beta_l$  as:

$$r_l = \exp(\gamma \beta_l)$$

1280 where  $\gamma$  is the average viral generation time (2.1 days)  
1281 ([http://sonorouschocolate.com/covid19/index.php?title=Estimating\\_Generation\\_](http://sonorouschocolate.com/covid19/index.php?title=Estimating_Generation_Time_Of_Omicron)  
1282 [Time\\_Of\\_Omicron](http://sonorouschocolate.com/covid19/index.php?title=Estimating_Generation_Time_Of_Omicron)).

1283 For parameter estimation, the intercept and slope parameters of the  
1284 BA.2 variant were fixed at 0. Consequently, the relative  $R_e$  of BA.2 was fixed at 1,  
1285 and those of the other lineages were estimated relative to that of BA.2.

1286 Parameter estimation was performed via the MCMC approach  
1287 implemented in CmdStan v2.28.1 (<https://mc-stan.org>) with CmdStanr v0.4.0  
1288 (<https://mc-stan.org/cmdstanr/>). Noninformative priors were set for all  
1289 parameters. Four independent MCMC chains were run with 500 and 2,000 steps

in the warmup and sampling iterations, respectively. We confirmed that all estimated parameters showed < 1.01 R-hat convergence diagnostic values and > 200 effective sampling size values, indicating that the MCMC runs were successfully convergent. The fitted model closely recapitulated the observed viral lineage dynamics (**Figures 1E and S1D**). The above analyses were performed in R v4.1.3 (<https://www.r-project.org/>). Information on the relative effective reproduction number of BA.2 estimated in the present study is summarized in **Table S3**.

### Plasmid construction

Plasmids expressing the SARS-CoV-2 S proteins of B.1.1 (the parental D614G-bearing variant) and BA.2 were prepared in our previous studies ([Kimura et al., 2022a](#); [Ozono et al., 2021](#); [Suzuki et al., 2022](#); [Yamasoba et al., 2022a](#)). Plasmids expressing the codon-optimized S proteins of L452R/Q/M-bearing variants and their derivatives were generated by site-directed overlap extension PCR using the primers listed in **Table S6**. The resulting PCR fragment was digested with KpnI and NotI and inserted into the corresponding site of the pCAGGS vector ([Niwa et al., 1991](#)). A plasmid encoding the SARS-CoV-2 BA.2 S RBD (residues 322-536) was cloned into the expression vector pHLsec containing the N-terminal secretion signal sequence and the C-terminal His<sup>6</sup>-tag sequence ([Aricescu et al., 2006](#)). Nucleotide sequences were determined by DNA sequencing services (Eurofins), and the sequence data were analyzed by Sequencher v5.1 software (Gene Codes Corporation).

### Preparation of BA.2 S RBD

The BA.2 S RBD was prepared as previously described ([Kubota et al., 2016](#)). Briefly, the expression plasmid encoding the BA.2 S RBD was transfected into 293S GnTI(-) cells ([Kubota et al., 2016](#)). The proteins in the culture supernatant were purified with cOmplete His-Tag Purification Resin (Roche) affinity column, followed by Superdex 75 Increase 10/300 size-exclusion chromatography (Cytiva) with calcium- and magnesium-free PBS buffer.

### Preparation of mouse sera

BALB/c mice (female, 7 weeks old) were immunized with 1 µg SARS-CoV-2 BA.2 RBD protein in 50% AddaVax (Invivogen, Cat# vac-adx-10) at day 0 and 14. Ten days after second immunization, blood was collected in BD microtainer blood collection tubes (BD Biosciences, Cat# 365967) and sera were collected by centrifugation.

### Preparation of human airway and alveolar epithelial cells from human iPSCs



1331 The air-liquid interface culture of airway and alveolar epithelial cells were  
1332 differentiated from human iPSC-derived lung progenitor cells as previously  
1333 described (Gotoh *et al.*, 2014; Konishi *et al.*, 2016; Yamamoto *et al.*, 2017).  
1334 Briefly, lung progenitor cells were stepwise induced from human iPSCs referring  
1335 a 21-days and 4-steps protocol (Yamamoto *et al.*, 2017). At day 21, lung  
1336 progenitor cells were isolated with specific surface antigen carboxypeptidase M  
1337 and seeded onto upper chamber of 24-well Cell Culture Insert (Falcon, #353104),  
1338 followed by 28-day and 7-day differentiation of airway and alveolar epithelial  
1339 cells, respectively. Alveolar differentiation medium supplemented with  
1340 dexamethasone (Sigma-Aldrich, Cat# D4902), KGF (PeproTech, Cat# 100-19),  
1341 8-Br-cAMP (Biolog, Cat# B007), 3-Isobutyl 1-methylxanthine (IBMX),  
1342 CHIR99021 (Axon Medchem, Cat# 1386), and SB431542 (FUJIFILM Wako,  
1343 Cat# 198-16543) was used for induction of alveolar epithelial cells. PneumaCult  
1344 ALI (STEMCELL Technologies, Cat# ST-05001) supplemented with heparin and  
1345 Y-27632 (LC Laboratories, Cat# Y-5301) hydrocortisone (Sigma-Aldrich, Cat#  
1346 H0135) was used for induction of airway epithelial cells.

1347

# **Neutralization assay**

1349 Pseudoviruses were prepared as previously described (Kimura *et al.*, 2022a;  
1350 Meng *et al.*, 2022; Ozono *et al.*, 2021; Saito *et al.*, 2022; Uriu *et al.*, 2022; Uriu *et al.*,  
1351 *et al.*, 2021; Yamasoba *et al.*, 2022a; Yamasoba *et al.*, 2022b). Briefly, lentivirus  
1352 (HIV-1)-based, luciferase-expressing reporter viruses were pseudotyped with  
1353 the SARS-CoV-2 S proteins. HEK293T cells (1,000,000 cells) were  
1354 cotransfected with 1 µg psPAX2-IN/HiBiT (Ozono *et al.*, 2020), 1 µg pWPI-Luc2  
1355 (Ozono *et al.*, 2020), and 500 ng plasmids expressing parental S or its  
1356 derivatives using PEI Max (Polysciences, Cat# 24765-1) according to the  
1357 manufacturer's protocol. Two days posttransfection, the culture supernatants  
1358 were harvested and centrifuged. The pseudoviruses were stored at -80°C until  
1359 use.

1360 Neutralization assay (**Figure 2**) was prepared as previously described  
1361 (Kimura *et al.*, 2022a; Meng *et al.*, 2022; Ozono *et al.*, 2021; Saito *et al.*, 2022;  
1362 Uriu *et al.*, 2022; Uriu *et al.*, 2021; Yamasoba *et al.*, 2022a; Yamasoba *et al.*,  
1363 2022b). Briefly, the SARS-CoV-2 S pseudoviruses (counting ~20,000 relative  
1364 light units) were incubated with serially diluted (120-fold to 97,480-fold dilution at  
1365 the final concentration) heat-inactivated sera at 37°C for 1 hour. Pseudoviruses  
1366 without sera were included as controls. Then, an 40 µl mixture of pseudovirus  
1367 and serum/antibody was added to HOS-ACE2/TMPRSS2 cells (10,000 cells/50  
1368 µl) in a 96-well white plate. At 2 d.p.i., the infected cells were lysed with a  
1369 One-Glo luciferase assay system (Promega, Cat# E6130) or a Bright-Glo  
1370 luciferase assay system (Promega, Cat# E2650), and the luminescent signal  
1371 was measured using a GloMax explorer multimode microplate reader 3500



(Promega) or CentroXS3 (Berthold Technologies). The assay of each serum was performed in triplicate, and the 50% neutralization titer (NT50) was calculated using Prism 9 software v9.1.1 (GraphPad Software).

1375

### 1376 **Pseudovirus infection**

Pseudovirus infection was (**Figure 3A**) performed as previously described (Kimura *et al.*, 2022a; Kimura *et al.*, 2022b; Motozono *et al.*, 2021; Saito *et al.*, 2022; Suzuki *et al.*, 2022; Uriu *et al.*, 2022; Uriu *et al.*, 2021; Yamasoba *et al.*, 2022a; Yamasoba *et al.*, 2022b). Briefly, the amount of pseudoviruses prepared was quantified by the HiBiT assay using Nano Glo HiBiT lytic detection system (Promega, Cat# N3040) as previously described (Ozono *et al.*, 2021; Ozono *et al.*, 2020), and the same amount of pseudoviruses (normalized to the HiBiT value, which indicates the amount of p24 HIV-1 antigen) was inoculated into HOS-ACE2/TMPRSS2 cells, HEK293-ACE2 cells or HEK293-ACE2/TMPRSS2 and viral infectivity was measured as described above (see “Neutralization assay” section). To analyze the effect of TMPRSS2 for pseudovirus infectivity (**Figure S2A**), the fold change of the values of HEK293-ACE2/TMPRSS2 to HEK293-ACE2 was calculated.

1390

### 1391 **Yeast surface display**

Yeast surface display (**Figure 3B**) was performed as previously described as previously described (Dejnirattisai *et al.*, 2022; Kimura *et al.*, 2022a; Kimura *et al.*, 2022b; Motozono *et al.*, 2021; Yamasoba *et al.*, 2022a; Zahradnik *et al.*, 2021a). Briefly, yeast codon-optimized SARS-CoV-2\_RBD-Omicron-BA.2 was obtained from Twist Biosciences and the mutant RBDs were PCR amplified by KAPA HiFi HotStart ReadyMix kit (Roche, Cat# KK2601) and assembled in vivo by yeast [*Saccharomyces cerevisiae* strain EBY100 (ATCC, MYA-4941)] homologous recombination with pJYDC1 plasmid (Addgene, Cat# 162458) as previously described (Dejnirattisai *et al.*, 2022; Kimura *et al.*, 2022a; Kimura *et al.*, 2022b; Motozono *et al.*, 2021; Yamasoba *et al.*, 2022a; Zahradnik *et al.*, 2021a). Primers used are listed in **Table S6**. Yeasts were expressed for 48 hours at 20°C, washed with PBS supplemented with bovine serum albumin at 1 g/l and incubated with 12–14 different concentrations of Expi293F cells produced ACE2 peptidase domain (residues 18-740, 200 nM to 13 pM) for 12 hours. To induce eUnaG2 reporter protein fluorescence, bilirubin (Sigma-Aldrich, Cat# 14370-1G) was added to the final concentration of 5 nM. RBD expression and ACE2 signal were recorded by using a FACS S3e cell sorter device (Bio-Rad), background binding signals were subtracted and data were fitted to a standard noncooperative Hill equation by nonlinear least-squares regression using Python v3.7 (<https://www.python.org>) as previously described (Kimura *et*

1412 *al.*, 2022a; Kimura *et al.*, 2022b; Motozono *et al.*, 2021; Yamasoba *et al.*, 2022a;  
1413 Zahradnik *et al.*, 2021b).

1414

# **SARS-CoV-2 S-based fusion assay**

1416 SARS-CoV-2 S-based fusion assay (**Figures 3D and S2C**) was performed as  
1417 previously described (Kimura *et al.*, 2022b; Motozono *et al.*, 2021; Saito *et al.*,  
1418 2022; Suzuki *et al.*, 2022; Yamasoba *et al.*, 2022a). Briefly, on day 1, effector  
1419 cells (i.e., S-expressing cells) and target cells (see below) were prepared at a  
1420 density of  $0.6\text{--}0.8 \times 10^6$  cells in a 6-well plate. To prepare effector cells, HEK293  
1421 cells were cotransfected with the S expression plasmids (400 ng) and pDSP<sub>8-11</sub>  
1422 (Kondo *et al.*, 2011) (400 ng) using TransIT-LT1 (Takara, Cat# MIR2300). On  
1423 day 2, to prepare target cells, VeroE6/TMPRSS2 cells were transfected with  
1424 pDSP<sub>1-7</sub> (Kondo *et al.*, 2011) (400 ng). On day 3 (24 hours posttransfection),  
1425 16,000 effector cells were detached and reseeded into 96-well black plates  
1426 (PerkinElmer, Cat# 6005225), and target cells (VeroE6/TMPRSS2 or  
1427 Calu-3/DSP<sub>1-7</sub> cells) were reseeded at a density of 1,000,000 cells/2 ml/well in  
1428 6-well plates. On day 4 (48 hours posttransfection), target cells were incubated  
1429 with EnduRen live cell substrate (Promega, Cat# E6481) for 3 hours and then  
1430 detached, and 32,000 target cells were added to a 96-well plate with effector  
1431 cells. *Renilla* luciferase activity was measured at the indicated time points using  
1432 Centro XS3 LB960 (Berthold Technologies). To measure the surface  
1433 expression level of S protein, effector cells were stained with rabbit  
1434 anti-SARS-CoV-2 S S1/S2 polyclonal antibody (Thermo Fisher Scientific, Cat#  
1435 PA5-112048, 1:100). Normal rabbit IgG (SouthernBiotech, Cat# 0111-01, 1:100)  
1436 was used as negative controls, and APC-conjugated goat anti-rabbit IgG  
1437 polyclonal antibody (Jackson ImmunoResearch, Cat# 111-136-144, 1:50) was  
1438 used as a secondary antibody. Surface expression level of S proteins (**Figures**  
1439 **3C and S2B**) was measured using FACS Canto II (BD Biosciences) and the  
1440 data were analyzed using FlowJo software v10.7.1 (BD Biosciences). To  
1441 calculate fusion activity, *Renilla* luciferase activity was normalized to the MFI of  
1442 surface S proteins. The normalized value (i.e., *Renilla* luciferase activity per the  
1443 surface S MFI) is shown as fusion activity.

1444

# **Coculture experiment**

1446 Coculture experiment (**Figure S2D**) was performed as previously described  
1447 (Suzuki *et al.*, 2022; Yamasoba *et al.*, 2022a). This assay utilizes a dual split  
1448 protein (DSP) encoding *Renilla* luciferase and *GFP* genes; the respective split  
1449 proteins, DSP<sub>8-11</sub> and DSP<sub>1-7</sub>, are expressed in effector and target cells by  
1450 transfection. Briefly, one day before transfection, effector cells (i.e.,  
1451 S-expressing cells) were seeded on the poly-L-lysine (Sigma, Cat# P4832)  
1452 coated coverslips put in a 12-well plate, and target cells were prepared at a

density of 100,000 cells in a 12-well plate. To prepare effector cells, HEK293 cells were cotransfected with the S-expression plasmids (500 ng) and pDSP<sub>8-11</sub> (500 ng) using PEI Max (Polysciences, Cat# 24765-1). To prepare target cells, HEK293 and HEK293-ACE2/TMPRSS2 cells were transfected with pDSP<sub>1-7</sub> (500 ng) (Kondo *et al.*, 2011). At 24 hours posttransfection, target cells were detached and cocultured with effector cells in a 1:2 ratio. At 9 h post-coculture, cells were fixed with 4% paraformaldehyde in PBS (Nacalai Tesque, Cat# 09154-85) for 15 minutes at room temperature. Nuclei were stained with Hoechst 33342 (Thermo Fisher Scientific, Cat# H3570). The coverslips were mounted on glass slides using Fluoromount-G (SouthernBiotech, Cat# 0100-01) with Hoechst 33342 and observed using an A1Rsi Confocal Microscope (Nikon). The size of syncytium (GFP-positive area) was measured using Fiji software v2.2.0 (ImageJ) as previously described (Suzuki *et al.*, 2022; Yamasoba *et al.*, 2022a).

#### SARS-CoV-2 reverse genetics

Recombinant SARS-CoV-2 was generated by circular polymerase extension reaction (CPER) as previously described (Kimura *et al.*, 2022b; Motozono *et al.*, 2021; Saito *et al.*, 2022; Torii *et al.*, 2021; Yamasoba *et al.*, 2022a). To generate the lineage A-based GFP-expressing chimeric recombinant SARS-CoV-2 (rBA.2.9.1 S-GFP, rBA.2.11 S-GFP, rBA.2.12.1 S-GFP and rBA.4/5 S-GFP) (Figure 4A, left), 7 DNA fragments (fragments 1-7) encoding the partial genome of SARS-CoV-2 (strain WK-521, PANGO lineage A; GISAID ID: EPI\_ISL\_408667) (Matsuyama *et al.*, 2020) were prepared by PCR using PrimeSTAR GXL DNA polymerase (Takara, Cat# R050A). A linker fragment encoding hepatitis delta virus ribozyme, bovine growth hormone poly A signal and cytomegalovirus promoter was also prepared by PCR. The corresponding SARS-CoV-2 genomic region and the PCR templates and primers used for this procedure are summarized in Table S6. Instead of the authentic fragment 9, we used the fragment 9, in which the *GFP* gene was inserted in the *ORF7a* frame (Table S6) (Torii *et al.*, 2021). To prepare the fragment 8 encoding the S genes of BA.2.9.1, BA.2.11, BA.2.12.1 and BA.4/5, we inserted additional mutations into the fragment 8 plasmid encoding the BA.2 S (Yamasoba *et al.*, 2022a) by site-directed overlap extension PCR using the primers listed in Table S6. Nucleotide sequences were determined by a DNA sequencing service (Fasmac), and the sequence data were analyzed by Sequencher software v5.1 (Gene Codes Corporation). Finally, the 10 DNA fragments were mixed and used for CPER (Torii *et al.*, 2021).

To generate the BA.2-based chimeric recombinant SARS-CoV-2 (rBA.2, rBA.2.9.1, rBA.2.11 and rBA.4/5) (Figure 4A, right), RNA was extracted from the cells infected with a clinical isolate of BA.2 (GISAID ID:

1494 EPI\_ISL\_9595859) and cDNA was synthesized as described above (see “Viral  
1495 genome sequencing” section). The two DNA fragments correspond to the  
1496 fragments 1-7 and 9 were prepared by RT-PCR using PrimeSTAR GXL DNA  
1497 polymerase (Takara, Cat# R050A) using the primers listed in **Table S6**. The  
1498 fragments 8 bearing the S genes of BA.2, BA.2.9.1, BA.2.11, BA.2.12.1 and  
1499 BA.4/5 were prepared as described above. Finally, the 3 DNA fragments were  
1500 mixed and used for CPER ([Torii et al., 2021](#)).

1501 To produce recombinant SARS-CoV-2 (seed viruses), the CPER  
1502 products were transfected into HEK293-C34 cells using TransIT-LT1 (Takara,  
1503 Cat# MIR2300) according to the manufacturer's protocol. At one day  
1504 posttransfection, the culture medium was replaced with DMEM (high glucose)  
1505 (Sigma-Aldrich, Cat# 6429-500ML) containing 2% FBS, 1% PS and doxycycline  
1506 (1 µg/ml; Takara, Cat# 1311N). At six days posttransfection, the culture medium  
1507 was harvested and centrifuged, and the supernatants were collected as the seed  
1508 virus. To remove the CPER products (i.e., SARS-CoV-2-related DNA), 1 ml of  
1509 the seed virus was treated with 2 µl TURBO DNase (Thermo Fisher Scientific,  
1510 Cat# AM2238) and incubated at 37°C for 1 hour. Complete removal of the CPER  
1511 products from the seed virus was verified by PCR. The working virus stock was  
1512 prepared using the seed virus as described below (see “SARS-CoV-2  
1513 preparation and titration” section).

1514

# **SARS-CoV-2 preparation and titration**

1515 The working virus stocks of chimeric recombinant SARS-CoV-2 were prepared  
1516 and titrated as previously described ([Kimura et al., 2022b](#); [Motozono et al., 2021](#);  
1517 [Saito et al., 2022](#); [Torii et al., 2021](#); [Yamasoba et al., 2022a](#)). In brief, 20 µl of the  
1518 seed virus was inoculated into VeroE6/TMPRSS2 cells (5,000,000 cells in a  
1519 T-75 flask). One hour postinfection (h.p.i.), the culture medium was replaced  
1520 with DMEM (low glucose) (Wako, Cat# 041-29775) containing 2% FBS and 1%  
1521 PS. At 3 d.p.i., the culture medium was harvested and centrifuged, and the  
1522 supernatants were collected as the working virus stock.

1524 The titer of the prepared working virus was measured as the 50%  
1525 tissue culture infectious dose (TCID<sub>50</sub>). Briefly, one day before infection,  
1526 VeroE6/TMPRSS2 cells (10,000 cells) were seeded into a 96-well plate. Serially  
1527 diluted virus stocks were inoculated into the cells and incubated at 37°C for 4  
1528 days. The cells were observed under microscopy to judge the CPE appearance.  
1529 The value of TCID<sub>50</sub>/ml was calculated with the Reed–Muench method ([Reed  
1530 and Muench, 1938](#)).

1531 To verify the sequences of SARS-CoV-2 working viruses, viral RNA  
1532 was extracted from the working viruses using a QIAamp viral RNA mini kit  
1533 (Qiagen, Cat# 52906) and viral genome sequences were analyzed as described  
1534 above (see “Viral genome sequencing” section). Information on the unexpected

1535 mutations detected is summarized in **Table S7**, and the raw data are deposited  
1536 in the GitHub repository  
1537 ([https://github.com/TheSatoLab/BA.2\\_related\\_Omicrons](https://github.com/TheSatoLab/BA.2_related_Omicrons)).  
1538

### 1539 **Plaque assay**

1540 Plaque assay (**Figures 4B and 4C**) was performed as previously described  
1541 ([Kimura et al., 2022b](#); [Motozono et al., 2021](#); [Saito et al., 2022](#); [Suzuki et al.,](#)  
1542 [2022](#); [Yamasoba et al., 2022a](#)). Briefly, one day before infection,  
1543 VeroE6/TMPRSS2 cells (100,000 cells) were seeded into a 24-well plate and  
1544 infected with SARS-CoV-2 (1, 10, 100 and 1,000 TCID<sub>50</sub>) at 37°C for 1 hour.  
1545 Mounting solution containing 3% FBS and 1.5% carboxymethyl cellulose (Wako,  
1546 Cat# 039-01335) was overlaid, followed by incubation at 37°C. At 3 d.p.i., the  
1547 culture medium was removed, and the cells were washed with PBS three times  
1548 and fixed with 4% paraformaldehyde phosphate (Nacalai Tesque, Cat#  
1549 09154-85). The fixed cells were washed with tap water, dried, and stained with  
1550 staining solution [0.1% methylene blue (Nacalai Tesque, Cat# 22412-14) in  
1551 water] for 30 minutes. The stained cells were washed with tap water and dried,  
1552 and the size of plaques was measured using Fiji software v2.2.0 (ImageJ).  
1553

### 1554 **SARS-CoV-2 infection**

1555 One day before infection, Vero cells (10,000 cells) and VeroE6/TMPRSS2 cells  
1556 (10,000 cells) were seeded into a 96-well plate. SARS-CoV-2 [1,000 TCID<sub>50</sub> for  
1557 Vero cells (**Figures 4D and 4F**); 100 TCID<sub>50</sub> for VeroE6/TMPRSS2 cells  
1558 (**Figures 4E and 4G**)] was inoculated and incubated at 37°C for 1 hour. The  
1559 infected cells were washed, and 180 µl culture medium was added. The culture  
1560 supernatant (10 µl) was harvested at the indicated timepoints and used for  
1561 RT-qPCR to quantify the viral RNA copy number (see “RT-qPCR” section  
1562 below) In the infection experiment using human iPSC-derived airway and  
1563 alveolar epithelial cells (**Figures 4H and 4I**), working viruses were diluted with  
1564 Opti-MEM (Thermo Fisher Scientific, 11058021). The diluted viruses (1,000  
1565 TCID<sub>50</sub> in 100 µl) were inoculated onto the apical side of the culture and  
1566 incubated at 37°C for 1 hour. The inoculated viruses were removed and  
1567 washed twice with Opti-MEM. To collect the viruses, 100 µl Opti-MEM was  
1568 applied onto the apical side of the culture and incubated at 37°C for  
1569 10 minutes. The Opti-MEM was collected and used for RT-qPCR to quantify  
1570 the viral RNA copy number (see “RT-qPCR” section below).  
1571

### 1572 **RT-qPCR**

1573 RT-qPCR was performed as previously described ([Kimura et al., 2022b](#); [Meng](#)  
1574 [et al., 2022](#); [Motozono et al., 2021](#); [Saito et al., 2022](#); [Suzuki et al., 2022](#);  
1575 [Yamasoba et al., 2022a](#)). Briefly, 5 µl culture supernatant was mixed with 5 µl 2



1576 × RNA lysis buffer [2% Triton X-100 (Nacalai Tesque, Cat# 35501-15), 50 mM  
1577 KCl, 100 mM Tris-HCl (pH 7.4), 40% glycerol, 0.8 U/μl recombinant RNase  
1578 inhibitor (Takara, Cat# 2313B)] and incubated at room temperature for 10 m.  
1579 RNase-free water (90 μl) was added, and the diluted sample (2.5 μl) was used  
1580 as the template for real-time RT-PCR performed according to the manufacturer's  
1581 protocol using One Step TB Green PrimeScript PLUS RT-PCR kit (Takara, Cat#  
1582 RR096A) and the following primers: Forward *N*, 5'-AGC CTC TTC TCG TTC  
1583 CTC ATC AC-3'; and Reverse *N*, 5'-CCG CCA TTG CCA GCC ATT C-3'. The  
1584 viral RNA copy number was standardized with a SARS-CoV-2 direct detection  
1585 RT-qPCR kit (Takara, Cat# RC300A). Fluorescent signals were acquired using  
1586 QuantStudio 3 Real-Time PCR system (Thermo Fisher Scientific), CFX Connect  
1587 Real-Time PCR Detection system (Bio-Rad), Eco Real-Time PCR System  
1588 (Illumina), qTOWER3 G Real-Time System (Analytik Jena) or 7500 Real-Time  
1589 PCR System (Thermo Fisher Scientific).

1590

# 1591 **Animal experiments**

1592 Animal experiments (**Figure 5**) were performed as previously described ([Saito et](#)  
1593 [al., 2022](#); [Suzuki et al., 2022](#); [Yamasoba et al., 2022a](#)). Syrian hamsters (male, 4  
1594 weeks old) were purchased from Japan SLC Inc. (Shizuoka, Japan). Baseline  
1595 body weights were measured before infection. For the virus infection  
1596 experiments, hamsters were anaesthetized by intramuscular injection of a  
1597 mixture of either 0.15 mg/kg medetomidine hydrochloride (Domitor<sup>®</sup>, Nippon  
1598 Zenyaku Kogyo), 2.0 mg/kg midazolam (FUJIFILM Wako Chemicals, Cat#  
1599 135-13791) and 2.5 mg/kg butorphanol (Vetorphale<sup>®</sup>, Meiji Seika Pharma), or  
1600 0.15 mg/kg medetomidine hydrochloride, 2.0 mg/kg alphaxalone (Alfaxan<sup>®</sup>,  
1601 Jurox) and 2.5 mg/kg butorphanol. The chimeric recombinant SARS-CoV-2  
1602 (rBA.2, rBA.2.12.1, and rBA.4/5) (10,000 TCID<sub>50</sub> in 100 μl), or saline (100 μl)  
1603 were intranasally inoculated under anesthesia. Oral swabs were collected at 1, 3,  
1604 and 5 d.p.i. Oral swabs were daily collected under anesthesia with isoflurane  
1605 (Sumitomo Dainippon Pharma). Body weight, enhanced pause (Penh), the ratio  
1606 of time to peak expiratory flow relative to the total expiratory time (Rpef) and  
1607 subcutaneous oxygen saturation (SpO<sub>2</sub>) were routinely monitored at indicated  
1608 timepoints (see "Lung function test" section below). Respiratory organs were  
1609 anatomically collected at 1, 3 and 5 d.p.i (for lung) or 1 d.p.i. (for trachea). Viral  
1610 RNA load in the respiratory tissues and oral swab were determined by  
1611 RT-qPCR. The respiratory tissues were also used for histopathological and IHC  
1612 analyses (see "H&E staining" and "IHC" sections below). Sera of infected  
1613 hamsters were collected at 16 d.p.i. using cardiac puncture under anesthesia  
1614 with isoflurane and used for neutralization assay (see "Neutralization assay"  
1615 above).

1616



## 1617 **Lung function test**

1618 Lung function test (**Figure 5A**) was performed at 1, 3, 5, and 7 d.p.i. as  
1619 previously described ([Suzuki et al., 2022](#); [Yamasoba et al., 2022a](#)). Respiratory  
1620 parameters (Penh and Rpef) were measured by using a whole-body  
1621 plethysmography system (DSI) according to the manufacturer's instructions. In  
1622 brief, a hamster was placed in an unrestrained plethysmography chamber and  
1623 allowed to acclimatize for 30 seconds, then, data were acquired over a  
1624 2.5-minute period by using FinePointe Station and Review softwares  
1625 v2.9.2.12849 (STARR). The state of oxygenation was examined by measuring  
1626 SpO<sub>2</sub> using pulse oximeter, MouseOx PLUS (STARR). SpO<sub>2</sub> was measured by  
1627 attaching a measuring chip to the neck of hamsters sedated by 0.25 mg/kg  
1628 medetomidine hydrochloride.

## 1630 **IHC**

1631 IHC (**Figures 5D, S3A and S3B**) was performed as previously described ([Saito](#)  
1632 [et al., 2022](#); [Suzuki et al., 2022](#); [Yamasoba et al., 2022a](#)) using an Autostainer  
1633 Link 48 (Dako). The deparaffinized sections were exposed to EnVision FLEX  
1634 target retrieval solution high pH (Agilent, Cat# K8004) for 20 minutes at 97°C to  
1635 activate, and mouse anti-SARS-CoV-2 N monoclonal antibody (clone 1035111,  
1636 R&D systems, Cat# MAB10474-SP, 1:400) was used as a primary antibody. The  
1637 sections were sensitized using EnVision FLEX (Agilent) for 15 minutes and  
1638 visualized by peroxidase-based enzymatic reaction with 3,3'-diaminobenzidine  
1639 tetrahydrochloride (Dako, Cat# DM827) as substrate for 5 minutes. The N  
1640 protein positivity (**Figures 5E and S3B**) was evaluated by certificated  
1641 pathologists as previously described ([Suzuki et al., 2022](#); [Yamasoba et al.,](#)  
1642 [2022a](#)). Images were incorporated as virtual slide by NDP.scan software v3.2.4  
1643 (Hamamatsu Photonics). The N-protein positivity was measured as the area  
1644 using Fiji software v2.2.0 (ImageJ).

## 1646 **H&E staining**

1647 H&E staining (**Figure 5G**) was performed as previously described ([Saito et al.,](#)  
1648 [2022](#); [Suzuki et al., 2022](#); [Yamasoba et al., 2022a](#)). Briefly, excised animal  
1649 tissues were fixed with 10% formalin neutral buffer solution, and processed for  
1650 paraffin embedding. The paraffin blocks were sectioned with 3 µm-thickness and  
1651 then mounted on MAS-GP-coated glass slides (Matsunami Glass, Cat# S9901).  
1652 H&E staining was performed according to a standard protocol.

## 1654 **Histopathological scoring**

1655 Histopathological scoring (**Figure 5F**) was performed as previously described  
1656 ([Saito et al., 2022](#); [Suzuki et al., 2022](#); [Yamasoba et al., 2022a](#)). Pathological  
1657 features including bronchitis or bronchiolitis, hemorrhage with congestive edema,

1658 alveolar damage with epithelial apoptosis and macrophage infiltration,  
1659 hyperplasia of type II pneumocytes, and the area of the hyperplasia of large type  
1660 II pneumocytes were evaluated by certified pathologists and the degree of these  
1661 pathological findings were arbitrarily scored using four-tiered system as 0  
1662 (negative), 1 (weak), 2 (moderate), and 3 (severe). The "large type II  
1663 pneumocytes" are the hyperplasia of type II pneumocytes exhibiting more than  
1664 10- $\mu$ m-diameter nucleus. We described "large type II pneumocytes" as one of  
1665 the remarkable histopathological features reacting SARS-CoV-2 infection in our  
1666 previous studies (Saito *et al.*, 2022; Suzuki *et al.*, 2022; Yamasoba *et al.*, 2022a).  
1667 Total histology score is the sum of these five indices.

1668 To measure the inflammation area in the infected lungs (**Figures 5H**  
1669 **and S3C**), four hamsters infected with each virus were sacrificed at 5 d.p.i., and  
1670 all four right lung lobes, including upper (anterior/cranial), middle, lower  
1671 (posterior/caudal), and accessory lobes, were sectioned along with their bronchi.  
1672 The tissue sections were stained by H&E, and the digital microscopic images  
1673 were incorporated into virtual slides using NDP.scan software v3.2.4  
1674 (Hamamatsu Photonics). The inflammatory area including type II pneumocyte  
1675 hyperplasia in the infected whole lungs was morphometrically analyzed using Fiji  
1676 software v2.2.0 (ImageJ).

1677

## 1678 **QUANTIFICATION AND STATISTICAL ANALYSIS**

1679 Statistical significance was tested using a two-sided Mann–Whitney *U*-test, a  
1680 two-sided Student's *t*-test or a two-sided paired *t*-test unless otherwise noted.  
1681 The tests above were performed using Prism 9 software v9.1.1 (GraphPad  
1682 Software).

1683 In the time-course experiments (**Figures 3D, 4D-4I, 5A-5C, 5F, and**  
1684 **S2C**), a multiple regression analysis including experimental conditions (i.e., the  
1685 types of infected viruses) as explanatory variables and timepoints as qualitative  
1686 control variables was performed to evaluate the difference between  
1687 experimental conditions thorough all timepoints. The initial time point was  
1688 removed from the analysis. *P* value was calculated by a two-sided Wald test.  
1689 Subsequently, familywise error rates (FWERs) were calculated by the Holm  
1690 method. These analyses were performed in R v4.1.2 (<https://www.r-project.org/>).

1691 In **Figures 5D, 5G and S3**, photographs shown are the representative  
1692 areas of at least two independent experiments by using four hamsters at each  
1693 timepoint. In **Figure S3A**, photographs shown are the representatives of >20  
1694 fields of view taken for each sample.

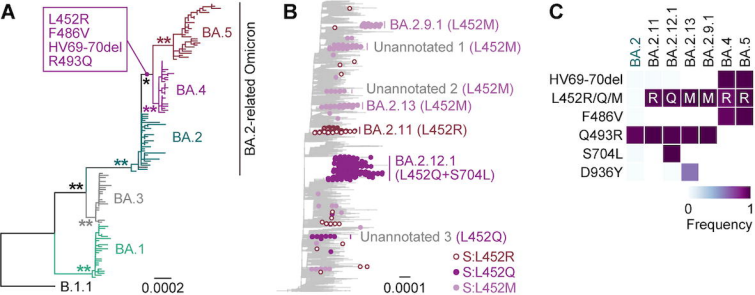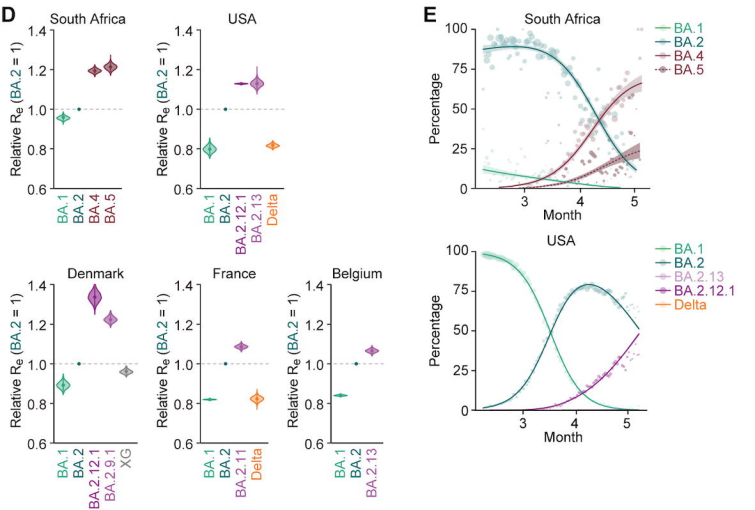

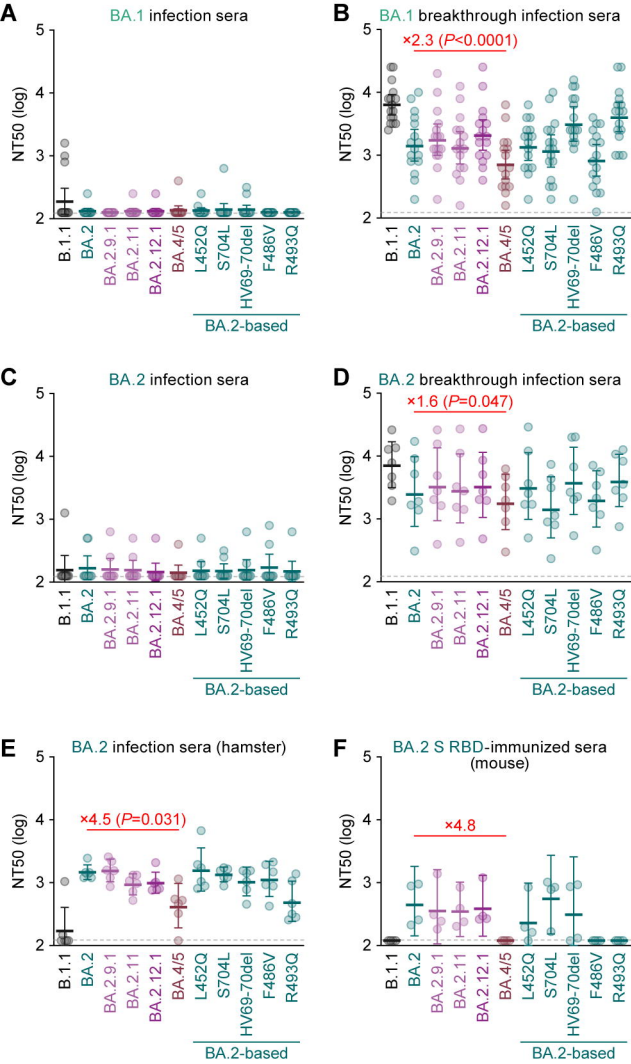

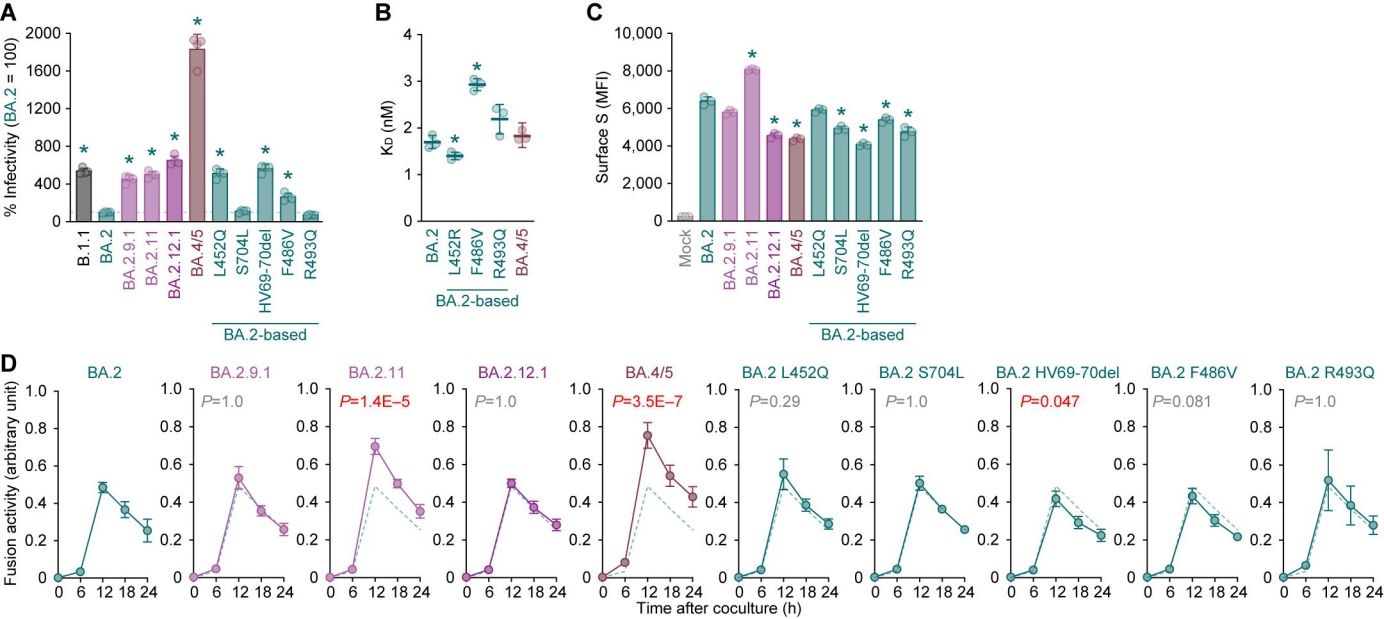

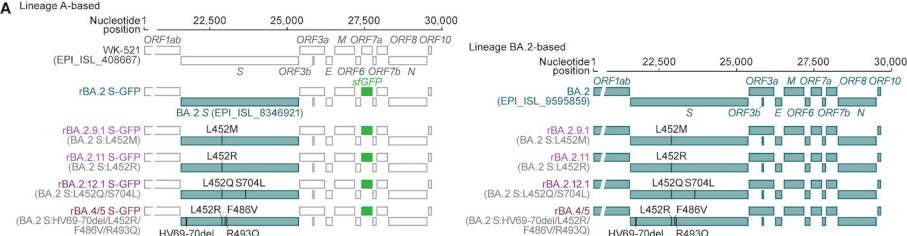



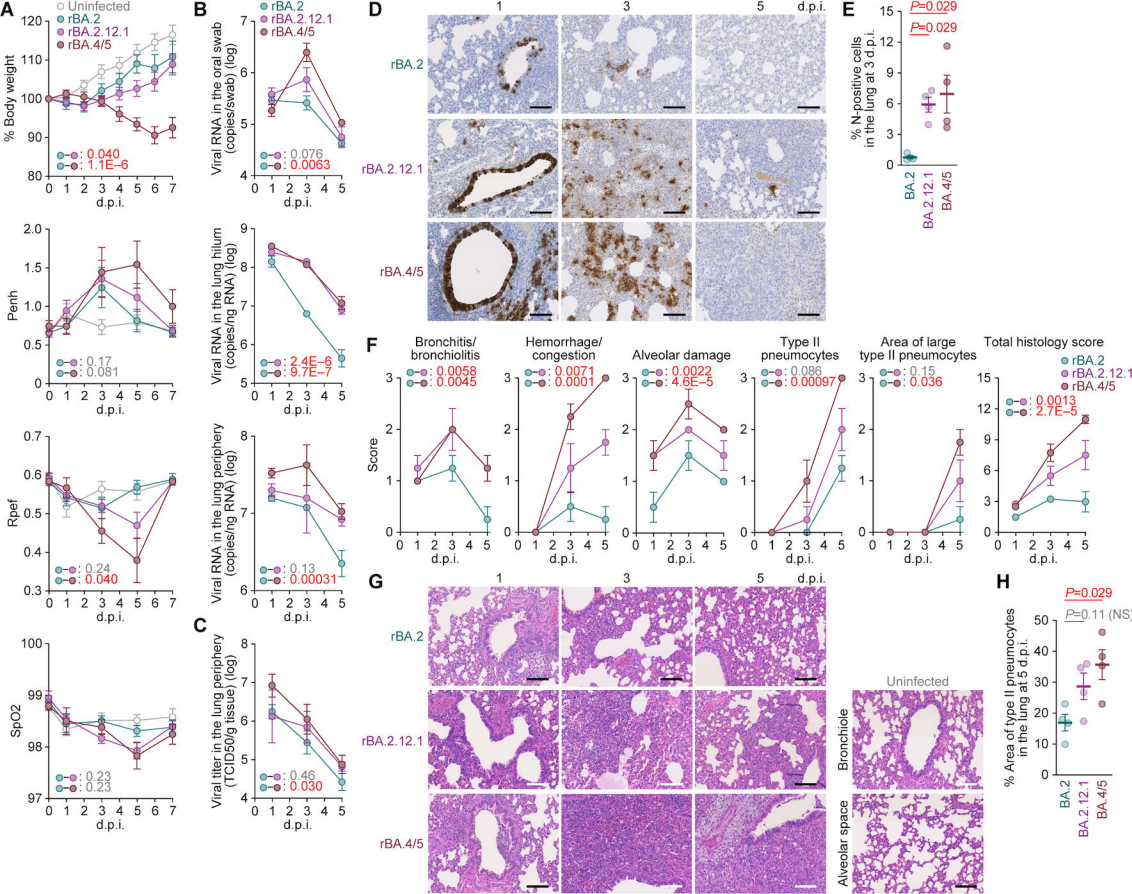

Source: https://biorxiv.org/content/10.1101/2022.05.26.493539v1.full.pdf
